# Supplementary material for: Stereochemical outcomes of C–F activation reactions of benzyl fluoride
Source: publisher site journal article supplement (doi:10.3762/bjoc.14.6), 2018-01-09

# Supporting Information File 1

for

## **Stereochemical outcomes of C–F activation reactions of benzyl fluoride**

Neil S. Keddie<sup>†,1</sup>, Pier Alexandre Champagne<sup>†,2</sup>, Justine Desroches<sup>2</sup>, Jean-François Paquin<sup>\*,2</sup> and David O'Hagan<sup>\*,1</sup>

Address: <sup>1</sup>School of Chemistry, Biomedical Sciences Research Complex, University of St Andrews, North Haugh, St Andrews, Fife KY16 9ST, United Kingdom and <sup>2</sup>PROTEO, CCVC, Département de chimie, 1045 Avenue de la Médecine, Université Laval, Québec, QC G1V 0A6, Canada

Email: Jean-François Paquin - jean-francois.paquin@chm.ulaval.ca; David O'Hagan - do1@st-andrews.ac.uk

<sup>†</sup> These authors contributed equally to this work.

\* Corresponding author

## **Experimental protocols**

## 1. General information

Unless otherwise noted, all commercial reagents were used without further purification. Dichloromethane and acetonitrile were purified using a Vacuum Atmospheres Inc. Solvent Purification System. Thin-layer chromatography (TLC) analysis of reaction mixtures was performed using Silicycle silica gel 60 Å F<sub>254</sub> TLC plates, and visualized under UV or by staining with iodine. Flash column chromatography was carried out on Silicycle Silica Gel 60 Å, 230 × 400 mesh. High resolution mass spectra were obtained on a LC/MS–TOF Agilent 6210 using either electrospray ionization (ESI) or atmospheric pressure photoionization (APPI). <sup>1</sup>H and <sup>13</sup>C nuclear magnetic resonance (NMR) spectra were recorded using Agilent DD2 500 and Varian Inova 400 spectrometers. <sup>1</sup>H and <sup>13</sup>C chemical shifts are reported in ppm downfield of tetramethylsilane and referenced to tetramethylsilane (δ = 0.00 ppm) or residual chloroform peak (δ = 7.26 ppm). Coupling constants (*J*) are measured in hertz (Hz). Multiplicities are reported using the following abbreviations: s = singlet, d = doublet, t = triplet, q = quartet, m = multiplet, br = broad resonance. Infrared spectra were recorded using a Thermo Scientific Nicolet 380 FTIR spectrometer. Melting points were recorded on a Stanford Research System OptiMelt capillary melting point apparatus and are uncorrected.

## 2. Experimental data

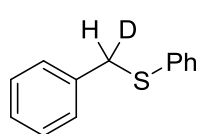

### 7-[<sup>2</sup>H<sub>1</sub>]Benzyl phenyl thioether (**5**)

<sup>1</sup>H NMR (500 MHz, CDCl<sub>3</sub>) δ (ppm) = 7.40 – 7.27 (m, 9H), 7.27 – 7.21 (m, 2H), 4.16 (t, *J* = 1.8 Hz, 1H); <sup>13</sup>C NMR (126 MHz, CDCl<sub>3</sub>) δ (ppm) = 137.5, 136.5, 129.9, 128.97, 128.95, 128.6, 127.3, 126.5, 38.9 (t, *J* = 21.5 Hz); IR (ATR, ZnSe) ν (cm<sup>-1</sup>) = 3059, 2922, 1583, 1569, 1478, 1451, 1438, 1021, 729, 699, 685; HRMS-ESI (+) *m/z* calcd for C<sub>13</sub>H<sub>11</sub>DNaS [M+Na]<sup>+</sup> 224.0615 found 224.0639.

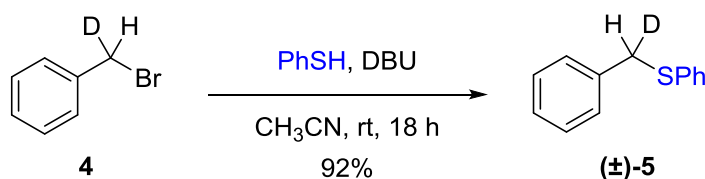

To a stirred solution of 7-[<sup>2</sup>H<sub>1</sub>]benzyl bromide (75 mg, 0.436 mmol, 1.0 equiv) under argon atmosphere in dry CH<sub>3</sub>CN (1.8 mL) were added thiophenol (90 μL, 2.0 equiv)

and 1,8-diazabicyclo[5.4.0]undec-7-ene (126  $\mu\text{L}$ , 1.9 equiv). The resulting solution was stirred at room temperature for 18 h. The reaction was quenched with 1 M NaOH and extracted with  $\text{Et}_2\text{O}$  (3 $\times$ ). The combined organic extracts were washed with 1 M NaOH, 3 M HCl and  $\text{H}_2\text{O}$ , dried with  $\text{MgSO}_4$ , filtered and evaporated under reduced pressure. The crude product was purified by silica gel chromatography using hexanes as the eluent to yield ( $\pm$ )-7- $^{[2}\text{H}_1]$ benzyl phenyl thioether **5** (81 mg, 92%) as a colorless solid; ee was racemic by  $^2\text{H}\{^1\text{H}\}$  NMR analysis with PBLG in  $\text{CHCl}_3$ .

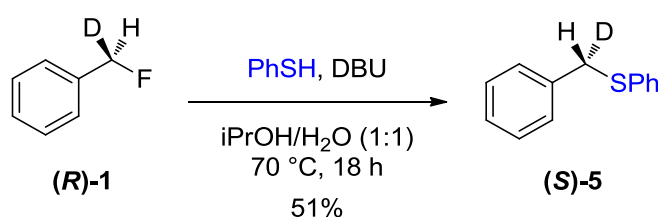

In a sealable vial, were successively added thiophenol (220  $\mu\text{L}$ , 3.0 equiv), 1,8-diazabicyclo[5.4.0]undec-7-ene (323  $\mu\text{L}$ , 3.0 equiv), isopropanol (0.72 mL) and  $\text{H}_2\text{O}$  (0.72 mL). (*R*)-7- $^{[2}\text{H}_1]$ benzyl fluoride (*(R)*-**1**, 75 mg, 0.436 mmol, 1.0 equiv) was then added and the vial was sealed. The resulting solution was stirred at 70  $^\circ\text{C}$  for 18 h. The reaction was quenched with  $\text{NaHCO}_3$  aq. sat. and extracted with  $\text{Et}_2\text{O}$  (3 $\times$ ). The combined organic extracts were washed with brine, dried with  $\text{MgSO}_4$ , filtered and evaporated under reduced pressure. The crude product was purified by silica gel chromatography using hexanes/ethyl acetate (99/1) as the eluent to yield (*S*)-7- $^{[2}\text{H}_1]$ benzyl phenyl thioether **5** (73 mg, 51%) as a colorless solid; 94% ee by  $^2\text{H}\{^1\text{H}\}$  NMR analysis with PBLG in  $\text{CHCl}_3$ .

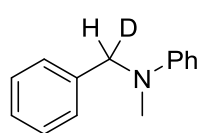

***N*-(7- $^{[2}\text{H}_1]$ benzyl)-*N*-methylaniline (**6**)**

$^1\text{H}$  NMR (500 MHz,  $\text{CDCl}_3$ )  $\delta$  (ppm) = 7.37 – 7.33 (m, 2H), 7.30 – 7.23 (m, 5H), 6.81 – 6.77 (m, 2H), 6.75 (tq,  $J = 7.2, 1.1$  Hz, 1H), 4.55 (t,  $J = 2.3$  Hz, 1H), 3.05 (s, 3H);  $^{13}\text{C}$  NMR (126 MHz,  $\text{CDCl}_3$ )  $\delta$  (ppm) = 149.8, 139.1, 129.3, 128.7, 127.0, 126.9, 116.6, 112.4, 56.4 (t,  $J = 20.1$  Hz), 38.6; IR (ATR, ZnSe)  $\nu$  ( $\text{cm}^{-1}$ ) = 3026, 2897, 1506, 1452, 1370, 1031, 861, 730; HRMS-ESI (+)  $m/z$  calcd for  $\text{C}_{14}\text{H}_{14}\text{DNNa}$   $[\text{M}+\text{Na}]^+$  221.1160 found 221.1162.

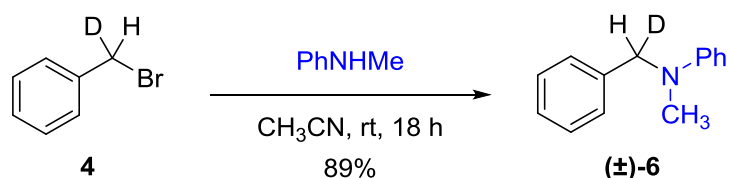

To a stirred solution of 7- $^{2}\text{H}_1$ ]benzyl bromide (75 mg, 0.436 mmol, 1.0 equiv) under argon atmosphere in dry  $\text{CH}_3\text{CN}$  (2.0 mL) was added *N*-methylaniline (142  $\mu\text{L}$ , 3.0 equiv). The resulting solution was stirred at room temperature for 18 h. The reaction was quenched with  $\text{NaHCO}_3$  aq. sat. and extracted with  $\text{Et}_2\text{O}$  (3x). The combined organic extracts were washed with  $\text{H}_2\text{O}$ , dried with  $\text{MgSO}_4$ , filtered and evaporated under reduced pressure. The crude product was purified by silica gel chromatography using hexanes/ethyl acetate (100:0 to 98:2) as the eluent to yield ( $\pm$ )-*N*-(7- $^{2}\text{H}_1$ ]benzyl)-*N*-methylaniline **6** (77 mg, 89%) as a yellow oil; ee was racemic by  $^2\text{H}\{^1\text{H}\}$  NMR analysis with PBLG in  $\text{CHCl}_3$ .

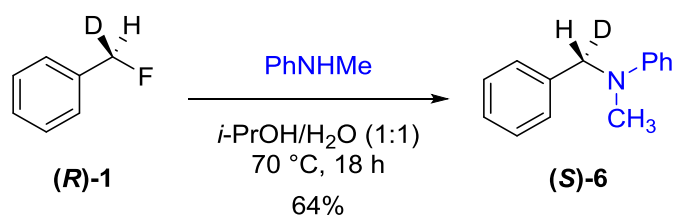

In a sealable vial, were successively added (*R*)-7- $^{2}\text{H}_1$ ]benzyl fluoride (83 mg, 0.747 mmol, 1.0 equiv), isopropanol (0.75 mL),  $\text{H}_2\text{O}$  (0.75 mL) and *N*-methylaniline (243  $\mu\text{L}$ , 3.0 equiv). The vial was sealed and the resulting solution was stirred at 70  $^\circ\text{C}$  for 18 h. The reaction was quenched with 1 M  $\text{Na}_2\text{CO}_3$  and extracted with  $\text{Et}_2\text{O}$  (3x). The combined organic extracts were washed with brine, dried with  $\text{MgSO}_4$ , filtered and evaporated under reduced pressure. The crude product was purified by silica gel chromatography using hexanes/ethyl acetate (100:0 to 99:1) as the eluent to yield (*S*)-*N*-(7- $^{2}\text{H}_1$ ]benzyl)-*N*-methylaniline ((*S*)-**6**, 56 mg, 64%) as a yellow oil; 90% ee by  $^2\text{H}\{^1\text{H}\}$  NMR analysis with PBLG in  $\text{CHCl}_3$ .

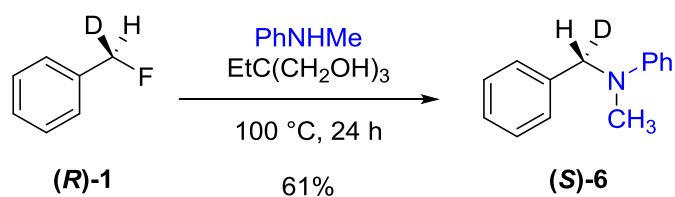

In a sealable vial, under argon atmosphere, were successively added (*R*)-7- $^{2}\text{H}_1$ ]benzyl fluoride (81 mg, 0.720 mmol, 1.0 equiv), freshly ground 1,1,1-

tris(hydroxymethyl)propane (106 mg, 1.1 equiv) and *N*-methylaniline (153  $\mu$ L, 2.0 equiv). The vial was sealed and the resulting solution was stirred at 100  $^{\circ}$ C for 24 h. The reaction was quenched with 1 M  $\text{Na}_2\text{CO}_3$  and extracted with  $\text{Et}_2\text{O}$  (3 $\times$ ). The combined organic extracts were washed with brine, dried with  $\text{MgSO}_4$ , filtered and evaporated under reduced pressure. The crude product was purified by silica gel chromatography using hexanes/ethyl acetate (98:2) as the eluent to yield (*S*)-*N*-(7- $^2\text{H}_1$ ]benzyl)-*N*-methylaniline ((*S*)-**6**, 53 mg, 61%) as a yellow oil; 87% ee by  $^2\text{H}\{^1\text{H}\}$  NMR analysis with PBLG in  $\text{CHCl}_3$ .

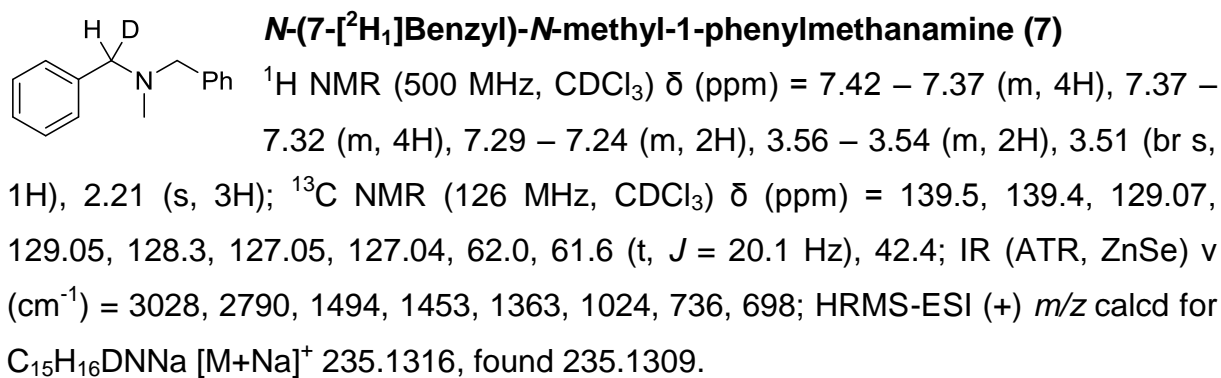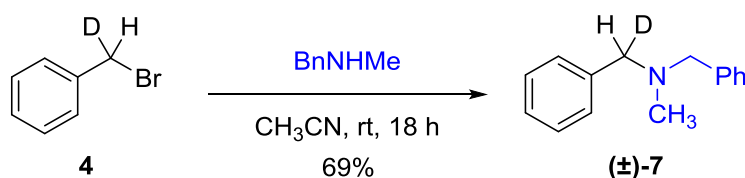

To a stirred solution of 7- $^2\text{H}_1$ ]benzyl bromide (75 mg, 0.436 mmol, 1.0 equiv) under argon atmosphere in dry  $\text{CH}_3\text{CN}$  (2.0 mL) was added *N*-benzylmethylamine (170  $\mu$ L, 3.0 equiv). The resulting solution was stirred at room temperature for 18 h. The reaction was quenched with 1 M  $\text{Na}_2\text{CO}_3$  and extracted with  $\text{Et}_2\text{O}$  (3 $\times$ ). The combined organic extracts were washed with  $\text{H}_2\text{O}$ , dried with  $\text{MgSO}_4$ , filtered and evaporated under reduced pressure. The crude product was purified by silica gel chromatography using hexanes/ethyl acetate (98/2) as the eluent to yield ( $\pm$ )-*N*-(7- $^2\text{H}_1$ ]benzyl)-*N*-methyl-1-phenylmethanamine (**7**, 64 mg, 69%) as a pale yellow oil; ee could not be determined as a result of poor  $^2\text{H}\{^1\text{H}\}$  NMR resolution.

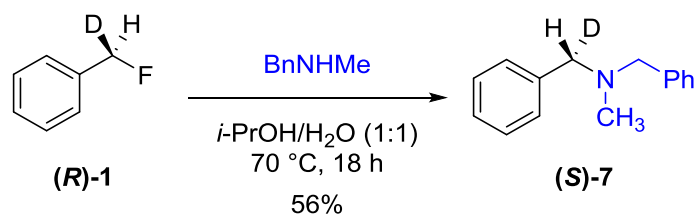

In a sealable vial, were successively added (*R*)-7- $^{[2}\text{H}_1]$ benzyl fluoride (80 mg, 0.720 mmol, 1.0 equiv), isopropanol (0.72 mL),  $\text{H}_2\text{O}$  (0.72 mL) and *N*-benzylmethylamine (279  $\mu\text{L}$ , 3.0 equiv). The vial was sealed and the resulting solution was stirred at 70  $^\circ\text{C}$  for 18 h. The reaction was quenched with 1 M  $\text{Na}_2\text{CO}_3$  and extracted with  $\text{Et}_2\text{O}$  (3 $\times$ ). The combined organic extracts were washed with brine, dried with  $\text{MgSO}_4$ , filtered and evaporated under reduced pressure. The crude product was purified by silica gel chromatography using hexanes/ethyl acetate (98/2) as the eluent to yield (*S*)-*N*-(7- $^{[2}\text{H}_1]$ benzyl)-*N*-methyl-1-phenylmethanamine ((*S*)-7, 85 mg, 56%) as a colorless oil; ee could not be determined as a result of poor  $^2\text{H}\{^1\text{H}\}$  NMR resolution

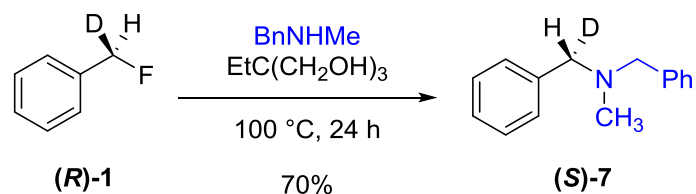

In a sealable vial, under argon atmosphere, were successively added (*R*)-7- $^{[2}\text{H}_1]$ benzyl fluoride (80 mg, 0.720 mmol, 1.0 equiv), freshly ground 1,1,1-tris(hydroxymethyl)propane (106 mg, 1.1 equiv) and *N*-benzylmethylamine (186  $\mu\text{L}$ , 2.0 equiv). The vial was sealed and the resulting solution was stirred at 100  $^\circ\text{C}$  for 24 h. The reaction was quenched with 1 M  $\text{Na}_2\text{CO}_3$  and extracted with  $\text{Et}_2\text{O}$  (3 $\times$ ). The combined organic extracts were washed with brine, dried with  $\text{MgSO}_4$ , filtered and evaporated under reduced pressure. The crude product was purified by silica gel chromatography using hexanes/ethyl acetate (98:2) as the eluent to yield (*S*)-*N*-(7- $^{[2}\text{H}_1]$ benzyl)-*N*-methyl-1-phenylmethanamine ((*S*)-7, 108 mg, 70%) as a colorless oil; ee could not be determined as a result of poor  $^2\text{H}\{^1\text{H}\}$  NMR resolution

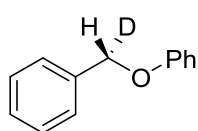

**(S)-7- $^{[2}\text{H}_1]$ benzyl phenyl ether (8)**

$^1\text{H}$  NMR (500 MHz,  $\text{CDCl}_3$ )  $\delta$  (ppm) = 7.46 – 7.42 (m, 2H), 7.42 – 7.35 (m, 2H), 7.35 – 7.27 (m, 3H), 7.01 – 6.93 (m, 3H), 5.06 (br s,

1H). Analytical data were identical to those previously reported [1].

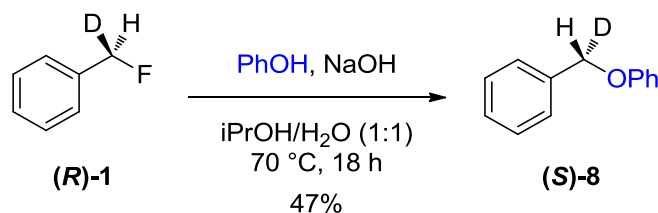

In a sealable vial, were successively added phenol (203 mg, 3.0 equiv), NaOH (86 mg, 3.0 equiv), isopropanol (0.72 mL) and H<sub>2</sub>O (0.72 mL). (*R*)-7-[<sup>2</sup>H<sub>1</sub>]benzyl fluoride (80 mg, 0.720 mmol, 1.0 equiv) was then added and the vial was sealed. The resulting solution was stirred at 70 °C for 18 h. The reaction was quenched with 1M Na<sub>2</sub>CO<sub>3</sub> and extracted with Et<sub>2</sub>O (3x). The combined organic extracts were washed with brine, dried with MgSO<sub>4</sub>, filtered and evaporated under reduced pressure. The crude product was purified by silica gel chromatography using hexanes/ethyl acetate (99:1) as the eluent to yield (*S*)-7-[<sup>2</sup>H<sub>1</sub>]benzyl phenyl ether ((*S*)-**8**, 63 mg, 47%) as a colorless solid; 93% ee by <sup>2</sup>H{<sup>1</sup>H} NMR analysis with PBLG in CHCl<sub>3</sub>.

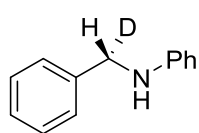

**(S)-N-(7-[<sup>2</sup>H<sub>1</sub>]benzyl)aniline (9)**

<sup>1</sup>H NMR (500 MHz, CDCl<sub>3</sub>) δ (ppm) = 7.40 – 7.33 (m, 4H), 7.31 – 7.26 (m, 11H), 7.20 – 7.15 (m, 2H), 6.72 (tt, *J* = 7.3, 1.1 Hz, 1H), 6.66 – 6.63 (m, 2H), 4.32 (t, *J* = 2.1 Hz, 1H), 4.03 (br s, 1H); <sup>13</sup>C NMR (126 MHz, CDCl<sub>3</sub>) δ (ppm) = 148.3, 139.5, 129.4, 128.8, 127.7, 127.4, 117.7, 113.0, 48.1 (t, *J* = 21.0 Hz); IR (ATR, ZnSe) ν (cm<sup>-1</sup>) = 3416, 3024, 1600, 1503, 1312, 746, 718, 689; HRMS-ESI (+) *m/z* calcd for C<sub>13</sub>H<sub>13</sub>DN [M+H]<sup>+</sup> 185.1184, found 185.1182.

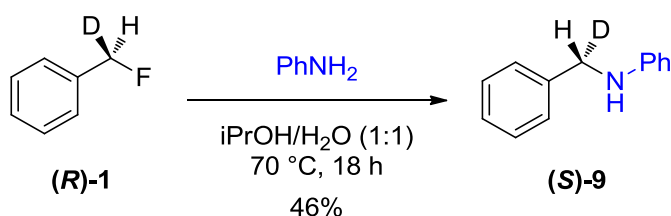

In a sealable vial, were successively added (*R*)-7-[<sup>2</sup>H<sub>1</sub>]benzyl fluoride (80 mg, 0.720 mmol, 1.0 equiv), isopropanol (0.72 mL), H<sub>2</sub>O (0.72 mL) and aniline (197 μL, 3.0 equiv). The vial was sealed and the resulting solution was stirred at 70 °C for

18 h. The reaction was quenched with 1M Na<sub>2</sub>CO<sub>3</sub> and extracted with Et<sub>2</sub>O (3x). The combined organic extracts were washed with brine, dried with MgSO<sub>4</sub>, filtered and evaporated under reduced pressure. The crude product was purified by silica gel chromatography using hexanes/ethyl acetate (98:2) as the eluent to yield (*S*)-*N*-(7-[<sup>2</sup>H<sub>1</sub>]benzyl)aniline ((*S*)-**9**, 61 mg, 46%) as a yellow oil; 91% ee by <sup>2</sup>H{<sup>1</sup>H} NMR analysis with PBLG in CHCl<sub>3</sub>.

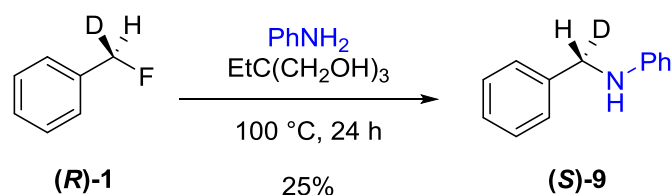

In a sealable vial, under argon atmosphere, were successively added (*R*)-7-[<sup>2</sup>H<sub>1</sub>]benzyl fluoride (80 mg, 0.720 mmol, 1.0 equiv), freshly ground 1,1,1-tris(hydroxymethyl)propane (106 mg, 1.1 equiv) and aniline (131 μL, 2.0 equiv). The vial was sealed and the resulting solution was stirred at 100 °C for 24 h. The reaction was quenched with 1 M Na<sub>2</sub>CO<sub>3</sub> and extracted with Et<sub>2</sub>O (3x). The combined organic extracts were washed with brine, dried with MgSO<sub>4</sub>, filtered and evaporated under reduced pressure. The crude product was purified by silica gel chromatography using hexanes/ethyl acetate (98:2) as the eluent to yield (*S*)-*N*-(7-[<sup>2</sup>H<sub>1</sub>]benzyl)-*N*-methyl-1-phenylmethanamine ((*S*)-**9**, 33 mg, 25%) as a yellow oil; 89% ee by <sup>2</sup>H{<sup>1</sup>H} NMR analysis with PBLG in CHCl<sub>3</sub>.

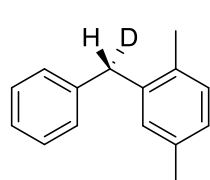

**(S)-2-(7-[<sup>2</sup>H<sub>1</sub>]Benzyl)-1,4-dimethylbenzene (10)**

<sup>1</sup>H NMR (500 MHz, CDCl<sub>3</sub>) δ (ppm) = 7.32 – 7.26 (m, 2H), 7.23 – 7.18 (m, 1H), 7.17 – 7.13 (m, 2H), 7.08 (d, *J* = 7.6 Hz, 1H), 6.99 (d, *J* = 7.6 Hz, 1H), 6.96 (s, 1H), 3.97 – 3.94 (m, 1H), 2.31 (s, 3H), 2.22 (s, 3H); <sup>13</sup>C NMR (101 MHz, CDCl<sub>3</sub>) δ (ppm) = 140.6, 138.8, 135.49, 135.48, 133.6, 130.9, 130.32, 130.31, 128.83, 128.5, 127.23, 127.22, 125.99, 125.98, 39.2 (t, *J* = 19.1 Hz), 21.1, 19.3; IR (ATR, ZnSe) ν (cm<sup>-1</sup>) = 3024, 2920, 1493, 1449, 1030, 809, 697; HRMS-APPI *m/z* calcd for C<sub>15</sub>H<sub>15</sub>D [M\*]<sup>+</sup> 197.1309, found 197.1310.



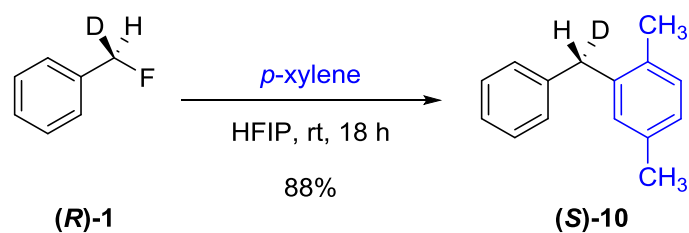

To a sealable vial were successively added (*R*)-7-[<sup>2</sup>H<sub>1</sub>]-benzyl fluoride (100 mg, 0.900 mmol, 1.0 equiv), *p*-xylene (555 μL, 5.0 equiv) and HFIP (3.6 mL). The resulting solution was stirred for 18 h at room temperature. The reaction was quenched with H<sub>2</sub>O and extracted with CH<sub>2</sub>Cl<sub>2</sub> (3x). The combined organic extracts were washed with brine, dried with MgSO<sub>4</sub>, filtered and evaporated under reduced pressure. The crude product was purified by silica gel chromatography using hexanes/ethyl acetate (99:1) as the eluent to yield (*S*)-2-(7-[<sup>2</sup>H<sub>1</sub>]benzyl)-1,4-dimethylbenzene ((*S*)-**10**, 156 mg, 88%) as a colorless oil; 24% ee by <sup>2</sup>H{<sup>1</sup>H} NMR analysis with PBLG in CHCl<sub>3</sub>.

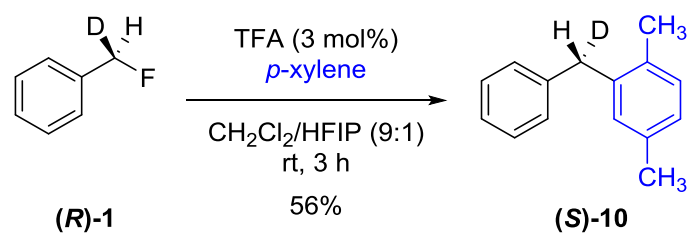

To a stirred solution of (*R*)-7-[<sup>2</sup>H<sub>1</sub>]benzyl fluoride (100 mg, 0.900 mmol, 1.0 equiv) in dry CH<sub>2</sub>Cl<sub>2</sub> (90% of the volume required for substrate concentration of 0.25 M) were added *p*-xylene (555 μL, 5.0 equiv) and HFIP (10% of the volume required for substrate concentration of 0.25 M, resulting in a 9:1 mixture of CH<sub>2</sub>Cl<sub>2</sub>/HFIP). Finally, TFA (0.2 M in CH<sub>2</sub>Cl<sub>2</sub>, 5 mol % of TFA) was added. The resulting solution was stirred for 3 h at room temperature. The reaction was quenched with H<sub>2</sub>O and extracted with CH<sub>2</sub>Cl<sub>2</sub> (3x). The combined organic extracts were washed with brine, dried with MgSO<sub>4</sub>, filtered and evaporated under reduced pressure. The crude product was purified by silica gel chromatography using hexanes/ethyl acetate (99:1) as the eluent to yield (*S*)-2-(7-[<sup>2</sup>H<sub>1</sub>]benzyl)-1,4-dimethylbenzene ((*S*)-**10**, 100 mg, 56%) as a colorless oil; 19% ee by <sup>2</sup>H{<sup>1</sup>H} NMR analysis with PBLG in CHCl<sub>3</sub>.

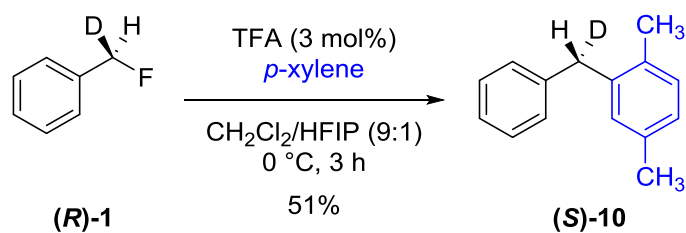

To a stirred solution of  $(R)$ -7- $^{2}\text{H}_1$ ]benzyl fluoride (100 mg, 0.900 mmol, 1.0 equiv) at 0 °C in dry  $\text{CH}_2\text{Cl}_2$  (90% of the volume required for substrate concentration of 0.25 M) were added  $p$ -xylene (555  $\mu\text{L}$ , 5.0 equiv) and HFIP (10% of the volume required for substrate concentration of 0.25 M, resulting in a 9:1 mixture of  $\text{CH}_2\text{Cl}_2/\text{HFIP}$ ). Finally, TFA (0.2 M in  $\text{CH}_2\text{Cl}_2$ , 5 mol % of TFA) was added. The resulting solution was stirred for 3 h at 0 °C. The reaction was quenched with  $\text{H}_2\text{O}$  and extracted with  $\text{CH}_2\text{Cl}_2$  (3 $\times$ ). The combined organic extracts were washed with brine, dried with  $\text{MgSO}_4$ , filtered and evaporated under reduced pressure. The crude product was purified by silica gel chromatography using hexanes/ethyl acetate (99:1) as the eluent to yield  $(S)$ -2-(7- $^{2}\text{H}_1$ ]benzyl)-1,4-dimethylbenzene ( $(S)$ -**10**, 91 mg, 51%) as a colorless oil; 28% ee by  $^2\text{H}\{^1\text{H}\}$  NMR analysis with PBLG in  $\text{CHCl}_3$ .

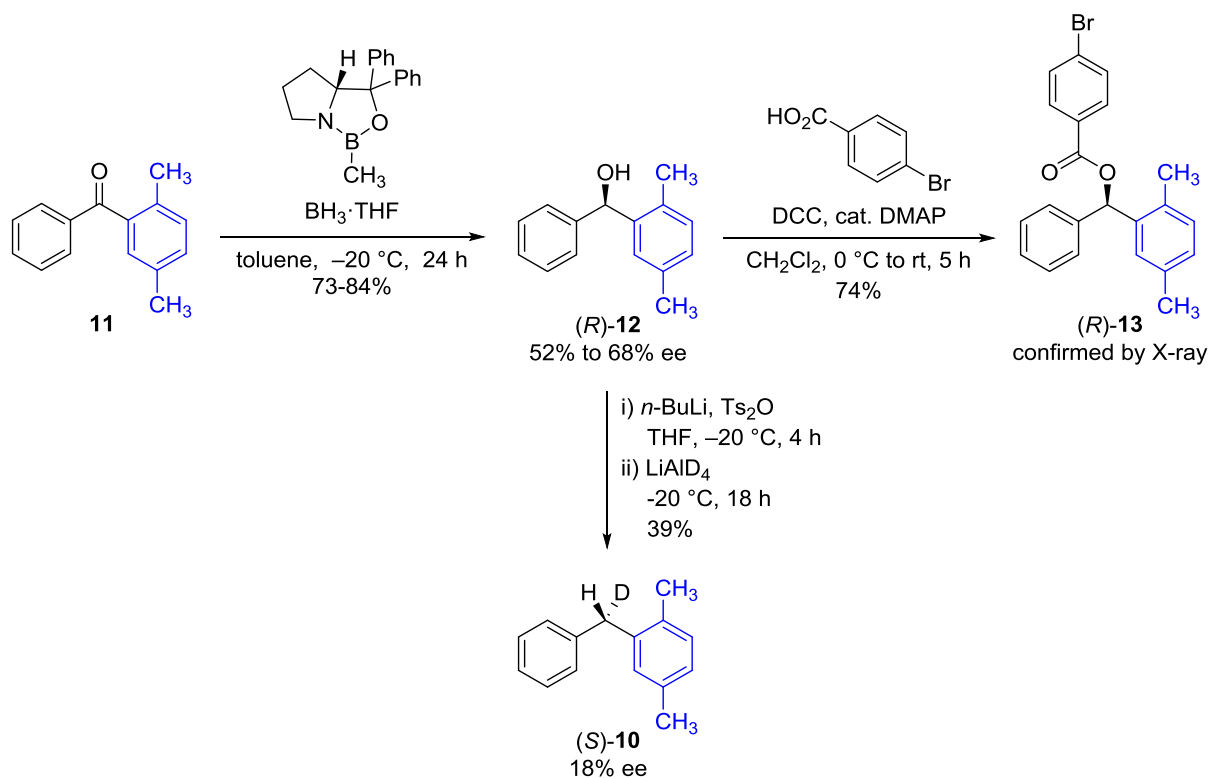

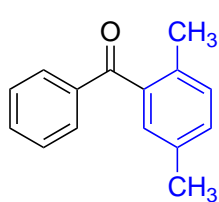

**(2,5-Dimethylphenyl)(phenyl)methanone (11)**

In a 50 mL round-bottomed flask with a magnetic stirrer, benzoyl chloride (826  $\mu$ L, 7.11 mmol, 1 equiv) and *p*-xylene (1.75 mL, 14.22 mmol, equiv) were dissolved in 15 mL  $\text{CH}_2\text{Cl}_2$ .  $\text{AlCl}_3$  (950 mg, 7.11 mmol, 1 equiv) was added and the reaction was stirred for 18 hours at 21  $^\circ\text{C}$ . The mixture was diluted with  $\text{H}_2\text{O}$  and additional  $\text{CH}_2\text{Cl}_2$ , extracted with  $\text{CH}_2\text{Cl}_2$  (2 $\times$ ) and the organic phases were washed with  $\text{H}_2\text{O}$  (2 $\times$ ), brine, then dried over  $\text{MgSO}_4$ , filtered and evaporated. After silica gel chromatography using hexanes/EtOAc (97/3), the title compound (1.30 g, 87%) was isolated as a slightly orange liquid. Spectral data were identical to those previously reported [2].

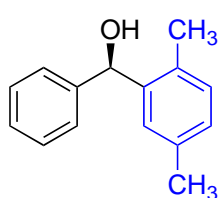

**(*R*)-(2,5-Dimethylphenyl)(phenyl)methanol ((*R*)-12)**

In a 100 mL round-bottomed flask equipped with a magnetic stir bar, (*R*)-2-methyl-CBS-oxazaborolidine (1 M in PhMe, 830  $\mu$ L, 0.83 mmol, 0.15 equiv) was mixed with  $\text{BH}_3\cdot\text{THF}$  (1 M in THF, 11.03 mL, 11.03 mmol, 2 equiv) at  $-20$   $^\circ\text{C}$ . A solution of (2,5-dimethylphenyl)(phenyl)methanone (1.16 g, 5.52 mmol, 1 equiv) in PhMe (38 mL) was then slowly added at this temperature. The reaction was stirred at  $-20$   $^\circ\text{C}$  for 18 h, and then the solvents were evaporated under reduced pressure. The crude mixture was diluted in  $\text{CH}_2\text{Cl}_2$ , washed with water, dried over  $\text{Na}_2\text{SO}_4$ , filtered and concentrated. After silica gel chromatography using hexanes/EtOAc (90/10), the title compound (989 mg, 84%) was isolated as a white solid. Spectral data were identical to those previously reported [2]. HPLC analysis (OJ-H, hexanes/*i*PrOH (95/5), 0.5 mL/min, 254.4 nm)  $t = 23.72$  min (24.25%), 25.73 min (75.75%).

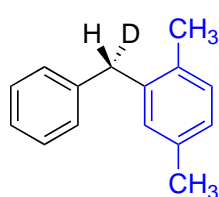

**(*S*)-2-(7- $[\text{}^2\text{H}_1]$ Benzyl)-1,4-dimethylbenzene ((*S*)-10)**

In a glass vessel equipped with a magnetic stir bar, a solution of (*R*)-(2,5-dimethylphenyl)(phenyl)methanol (150 mg, 0.71 mmol, 1 equiv) in 3 mL THF was prepared under argon atmosphere, then cooled to  $-20$   $^\circ\text{C}$ . *n*-BuLi (1.52 M in hexanes, 474  $\mu$ L, 0.71 mmol, 1 equiv) was added dropwise and the mixture was stirred at  $-20$   $^\circ\text{C}$  for one hour.  $\text{Ts}_2\text{O}$  (288 mg,

0.792 mmol, 1.1 equiv) was added and 3 mL THF was used to wash the vessel walls. The reaction was stirred at  $-20\text{ }^{\circ}\text{C}$  for 4 h, then  $\text{LiAlD}_4$  (90% purity, 66 mg, 1.44 mmol, 2 equiv) was added. The full mixture was stirred for 18 h at  $-20\text{ }^{\circ}\text{C}$ , then quenched with NaOH (2 M). The slurry was extracted with  $\text{CH}_2\text{Cl}_2$  (3 $\times$ ) and the combined organic extracts were washed with water, dried over  $\text{MgSO}_4$ , filtered and evaporated. Following silica gel chromatography using 100% hexanes, the pure product (54 mg, 39%) was isolated as a colorless liquid. Spectral data is as described above;  $[\alpha]_{\text{D}}^{21} = -0.54\text{ }^{\circ}$  ( $c = 0.97$ ,  $\text{CHCl}_3$ ); 18% ee by  $^2\text{H}\{^1\text{H}\}$  NMR analysis with PBLG in  $\text{CHCl}_3$ , as same enantiomer for **10** synthesised from (*R*)-**1** (See Supporting Information File 2 for spectrum).

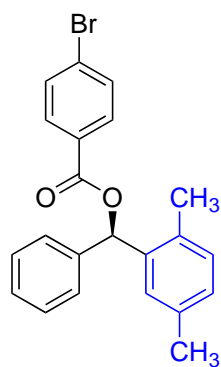

**(*R*)-(2,5-dimethylphenyl)(phenyl)methyl 4-bromobenzoate ((*R*)-**13**)**

In a glass vessel, 4-bromobenzoic acid (53 mg, 0.264 mmol, 1.1 equiv), DMAP (2 mg, 0.012 mmol, 5 mol %) and (*R*)-(2,5-dimethylphenyl)(phenyl)methanol (50 mg, 0.24 mmol, 1 equiv) were dissolved in 1 mL  $\text{CH}_2\text{Cl}_2$ . This solution was cooled to  $0\text{ }^{\circ}\text{C}$  and DCC (57 mg, 0.276 mmol, 1.15 equiv) was added. The reaction was stirred 5 min at  $0\text{ }^{\circ}\text{C}$ , then allowed back to room temperature and stirred for an additional 5 h. The reaction mixture was diluted with more  $\text{CH}_2\text{Cl}_2$  and this organic phase was washed with HCl (10%, 2 $\times$ ), sat.  $\text{NaHCO}_3$ , and then  $\text{H}_2\text{O}$ . It was finally dried over  $\text{MgSO}_4$ , filtered and concentrated. The desired compound (70 mg, 74%) was isolated as white needles by column chromatography using hexanes/EtOAc (95/5).  $^1\text{H}$  NMR (400 MHz,  $\text{CDCl}_3$ )  $\delta$  2.31 (s, 6H), 7.03-7.08 (m, 2H), 7.24 (m, 2H), 7.28-7.35 (m, 5H), 7.60 (d,  $J = 8.5$  Hz, 2H), 7.98 (d,  $J = 8.5$  Hz, 2H);  $^{13}\text{C}$  NMR (100 MHz,  $\text{CDCl}_3$ )  $\delta$  19.1, 21.2, 75.3, 127.4, 127.7, 127.9, 128.3, 128.5, 128.9, 129.1, 130.7, 131.3, 131.8, 132.8, 135.6, 137.6, 139.3, 164.9; IR (ATR, ZnSe)  $\nu = 2920$ , 1713, 1264, 1098, 1009, 812, 767, 704  $\text{cm}^{-1}$ ; HRMS-ESI calcd for  $\text{C}_{22}\text{H}_{19}\text{BrNaO}_2$   $[\text{M}+\text{Na}]^+$  417.0461, found 417.0441.

## Crystal data and structure refinement for 13.

|                                   |                                                           |
|-----------------------------------|-----------------------------------------------------------|
| Empirical formula                 | C <sub>22</sub> H <sub>19</sub> BrO <sub>2</sub>          |
| Temperature                       | 150(2) K                                                  |
| Wavelength                        | 0.71073 Å                                                 |
| Crystal system                    | Orthorhombic                                              |
| Space group                       | P 21 21 21                                                |
| Unit cell dimensions              | a = 7.1645(5) Å<br>b = 13.8680(10) Å<br>c = 18.0569(14) Å |
| Volume                            | 1794.1(2) Å <sup>3</sup>                                  |
| Z                                 | 4                                                         |
| Density (calculated)              | 1.463 mg/m <sup>3</sup>                                   |
| F(000)                            | 808                                                       |
| Crystal size                      | 0.520 x 0.380 x 0.260 mm <sup>3</sup>                     |
| Theta range for data collection   | 1.852 to 30.540°                                          |
| Index ranges                      | -10 ≤ h ≤ 10, -19 ≤ k ≤ 19, -25 ≤ l ≤ 25                  |
| Reflections collected             | 23036                                                     |
| Independent reflections           | 5481 [R(int) = 0.0279]                                    |
| Completeness to theta = 25.242°   | 100.0 %                                                   |
| Absorption correction             | Semi-empirical from equivalents                           |
| Max. and min. transmission        | 0.549 and 0.364                                           |
| Refinement method                 | Full-matrix least-squares on F <sup>2</sup>               |
| Data / restraints / parameters    | 5481 / 0 / 228                                            |
| Goodness-of-fit on F <sup>2</sup> | 1.024                                                     |
| Final R indices [I > 2σ(I)]       | R1 = 0.0269, wR2 = 0.0648                                 |
| R indices (all data)              | R1 = 0.0314, wR2 = 0.0663                                 |
| Absolute structure parameter      | 0.011(3)                                                  |
| Largest diff. peak and hole       | 0.594 and -0.482 e.Å <sup>-3</sup>                        |

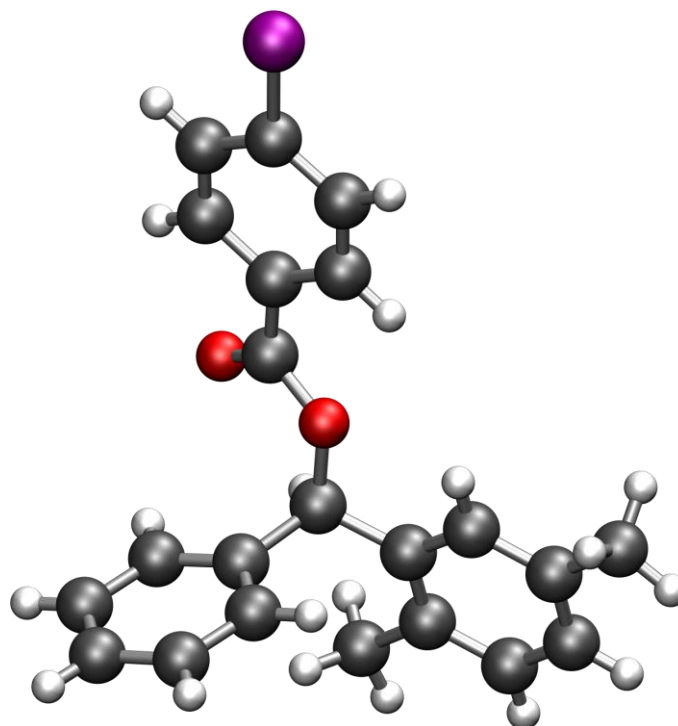

## References

1. Velasco, R.; Feberero, C.; Sanz, R. *Org. Lett.* **2015**, *17*, 4416–4419.
2. Desroches, J.; Champagne, P. A.; Benhassine, Y.; Paquin, J.-F. *Org. Biomol. Chem.* **2015**, *13*, 2243.

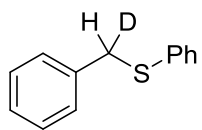

$^1\text{H}$  NMR (400 MHz,  $\text{CDCl}_3$ )

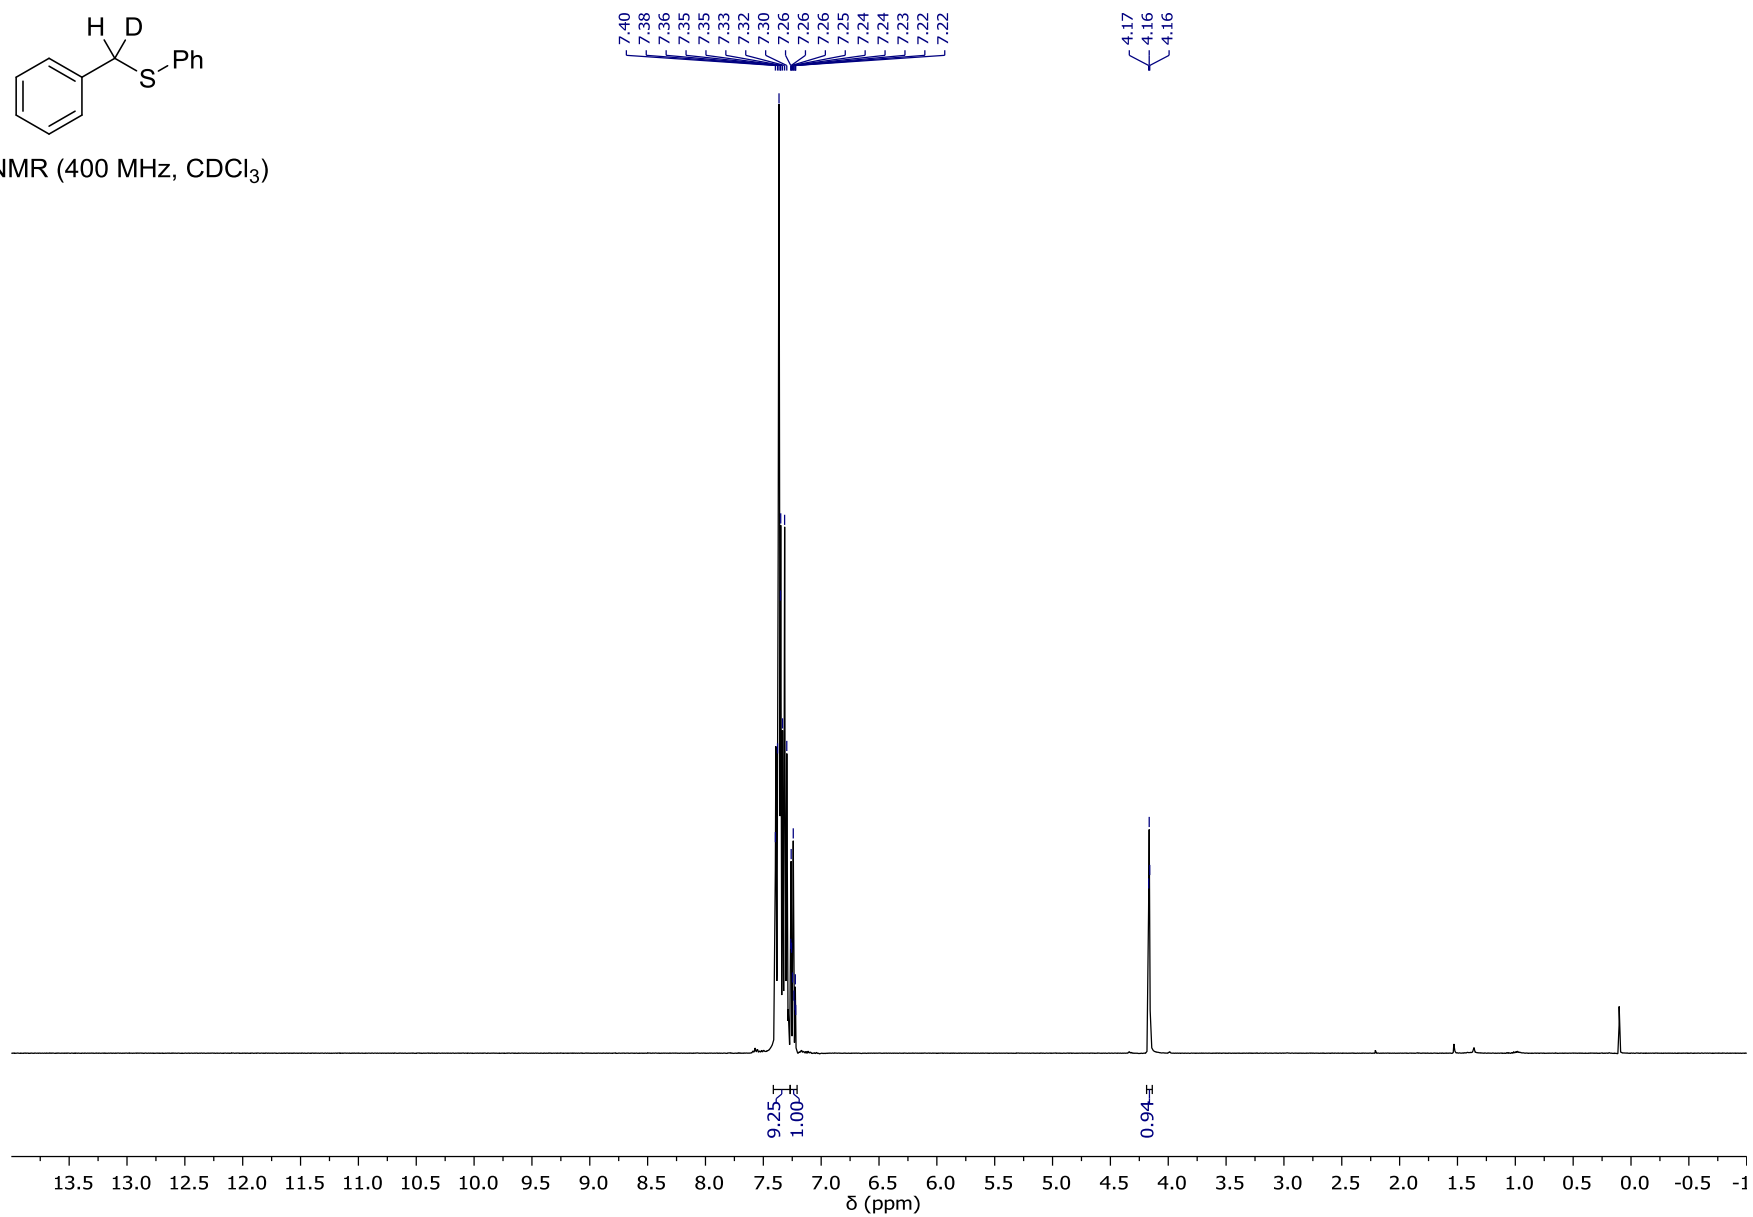

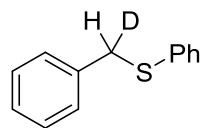

$^{13}\text{C}$  NMR (126 MHz,  $\text{CDCl}_3$ )

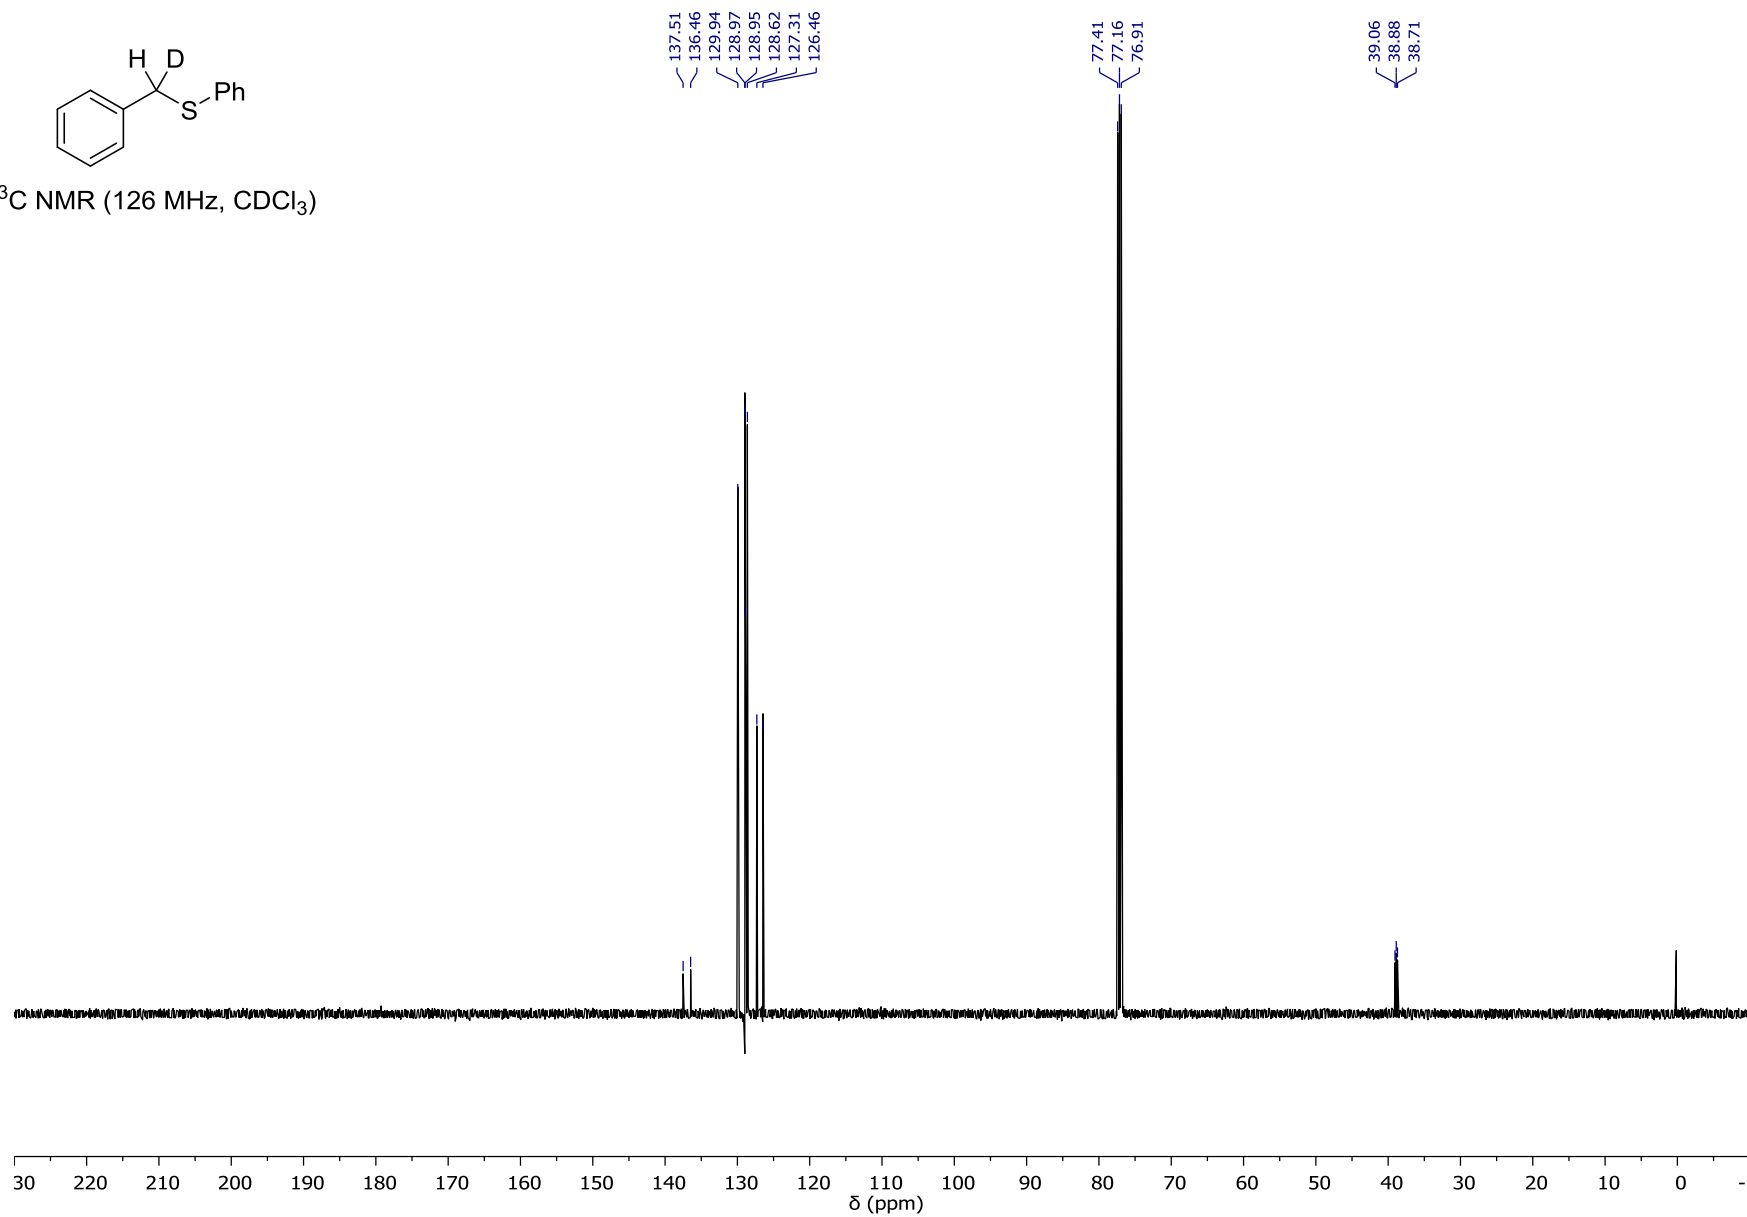



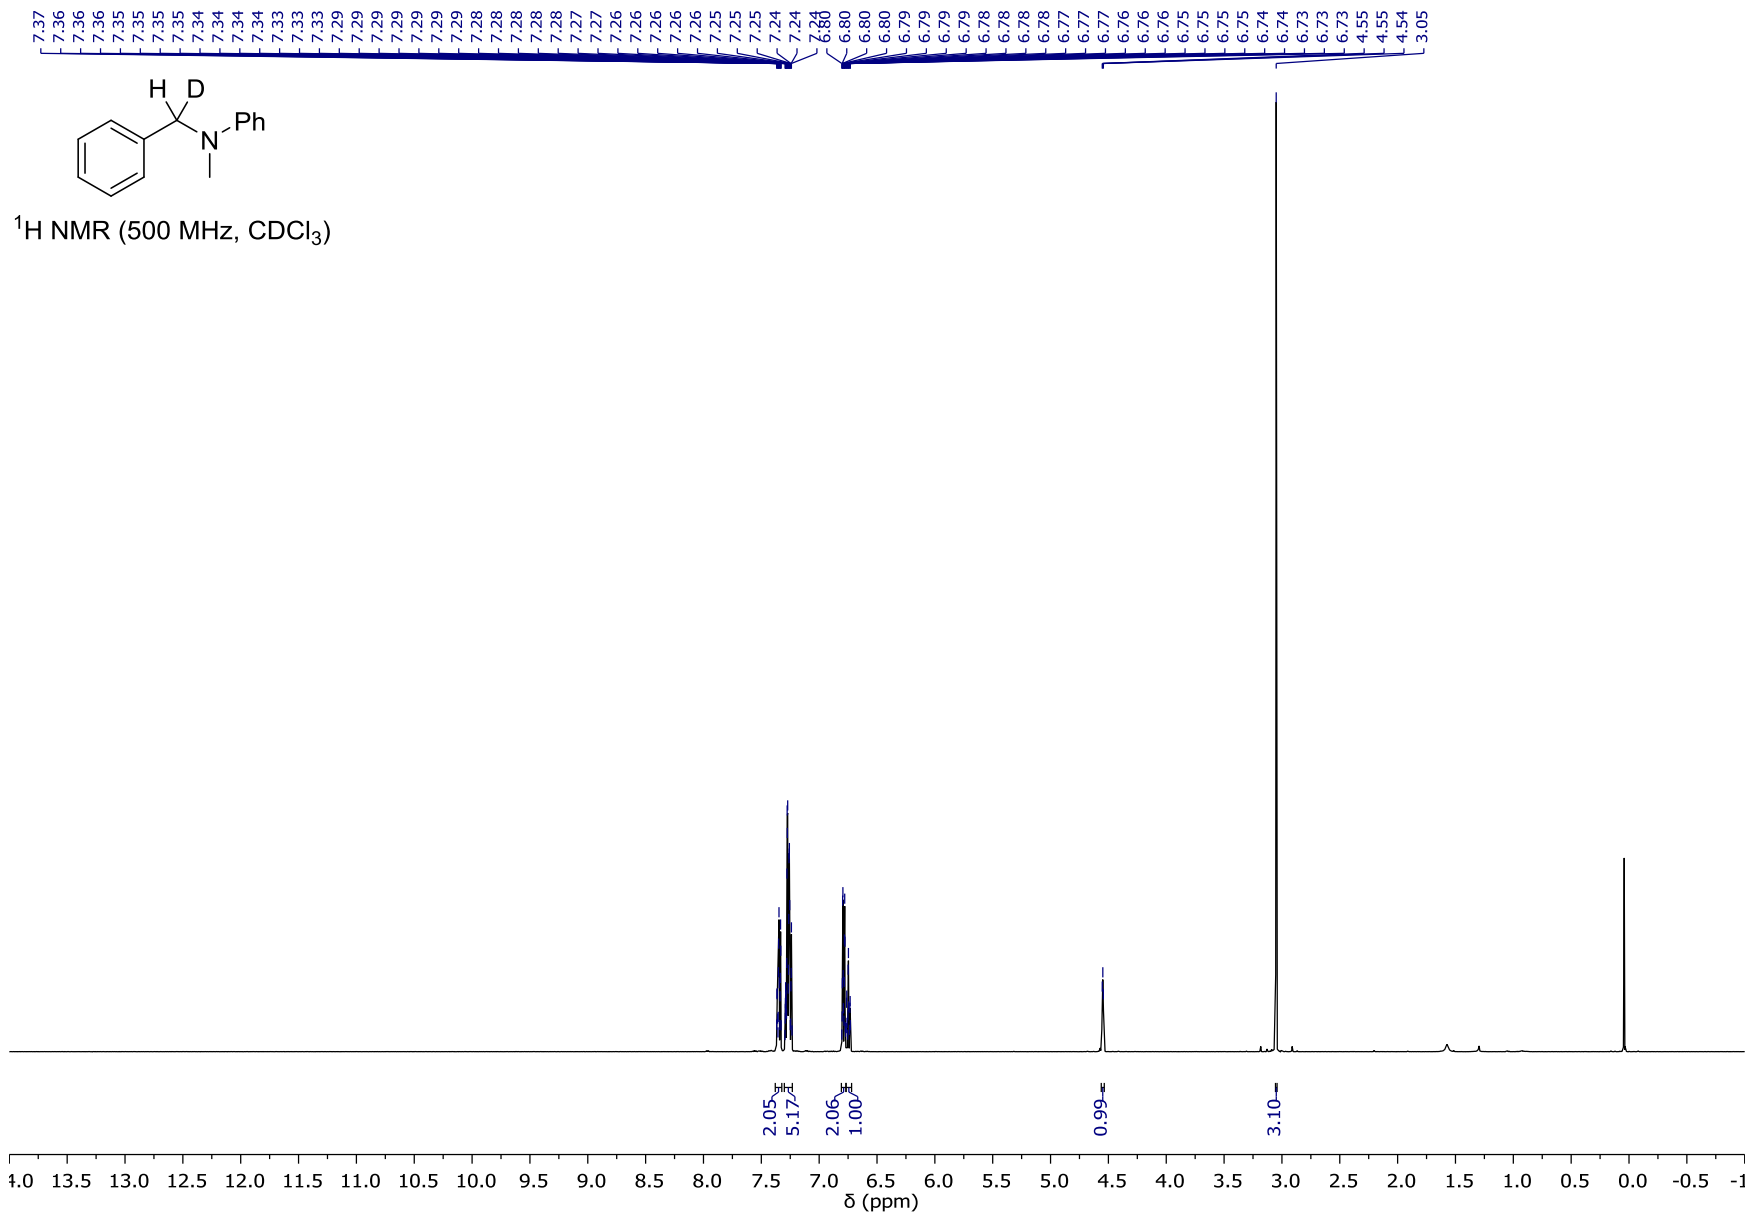

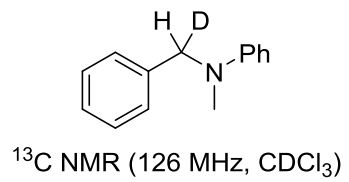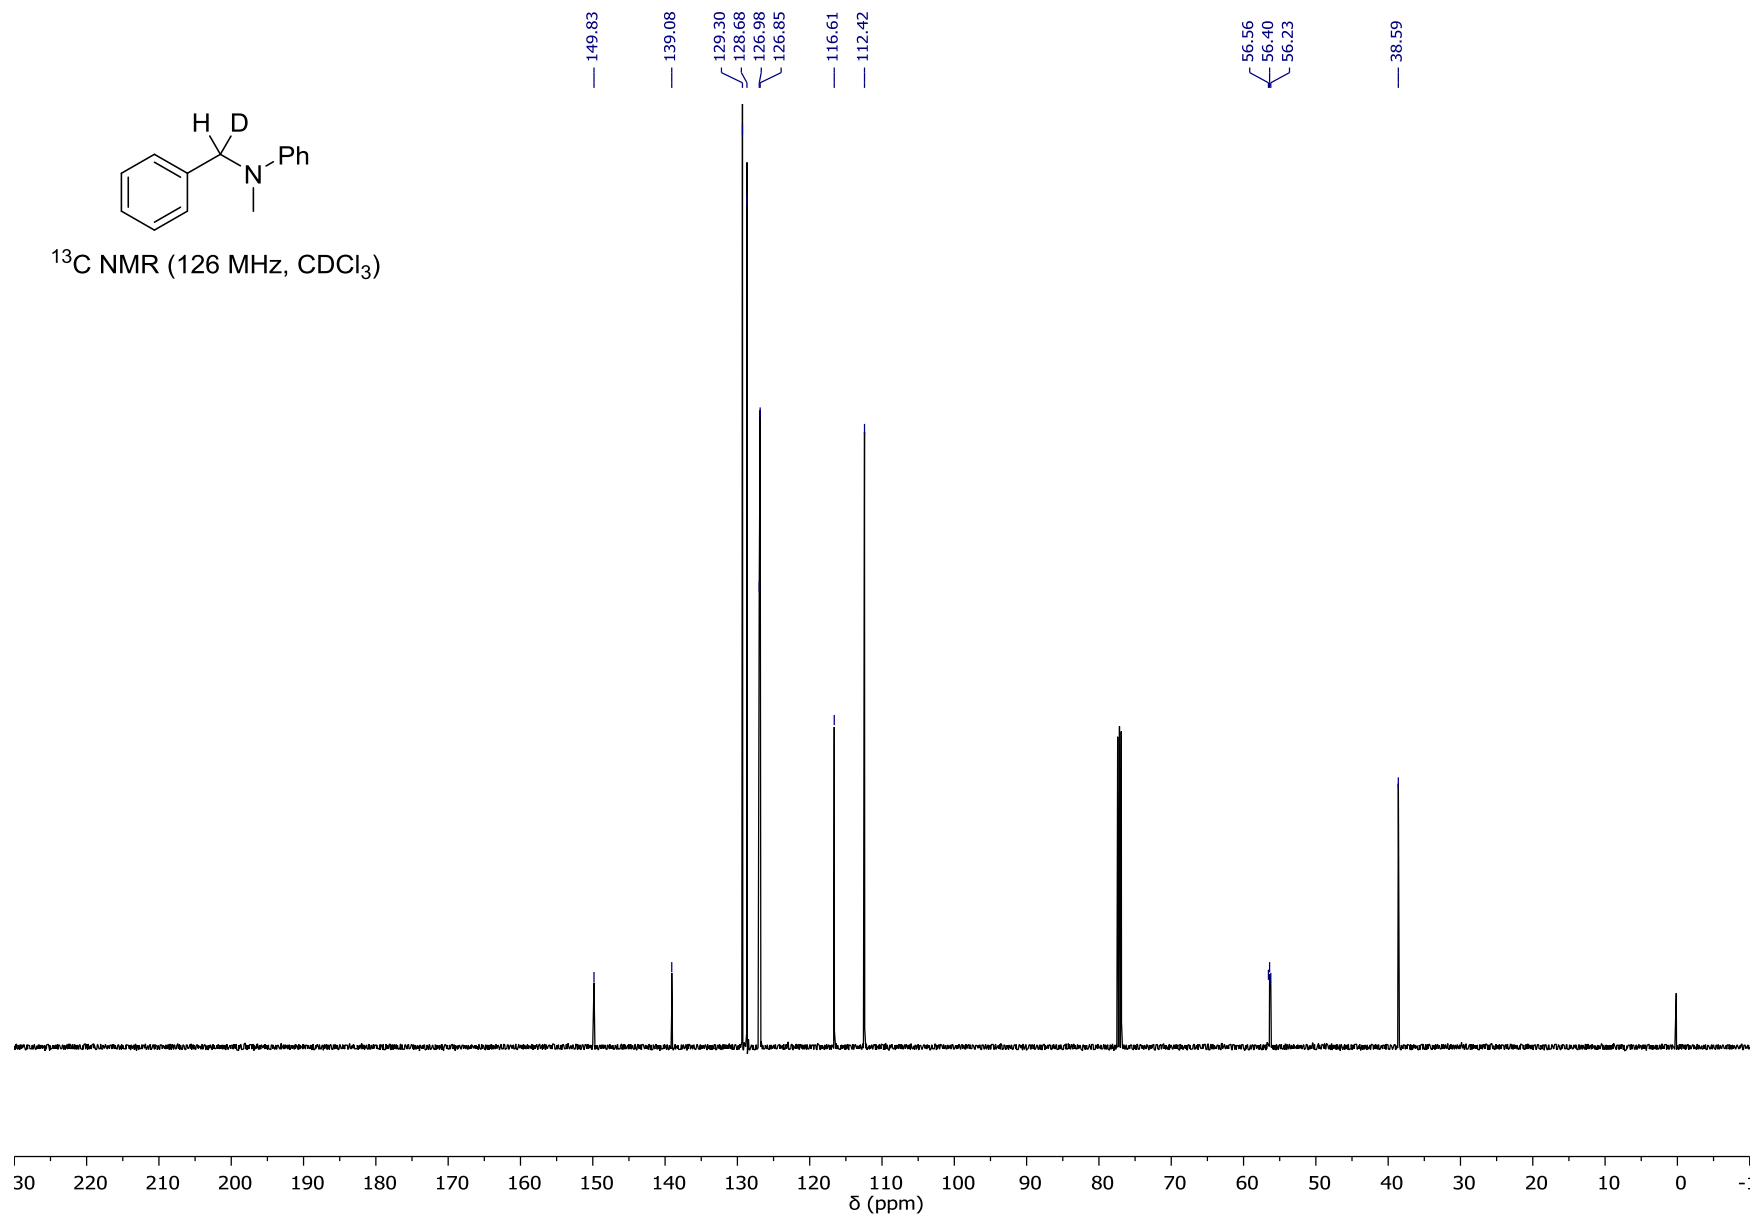

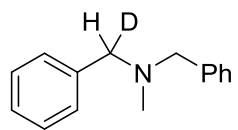

$^1\text{H}$  NMR (500 MHz,  $\text{CDCl}_3$ )

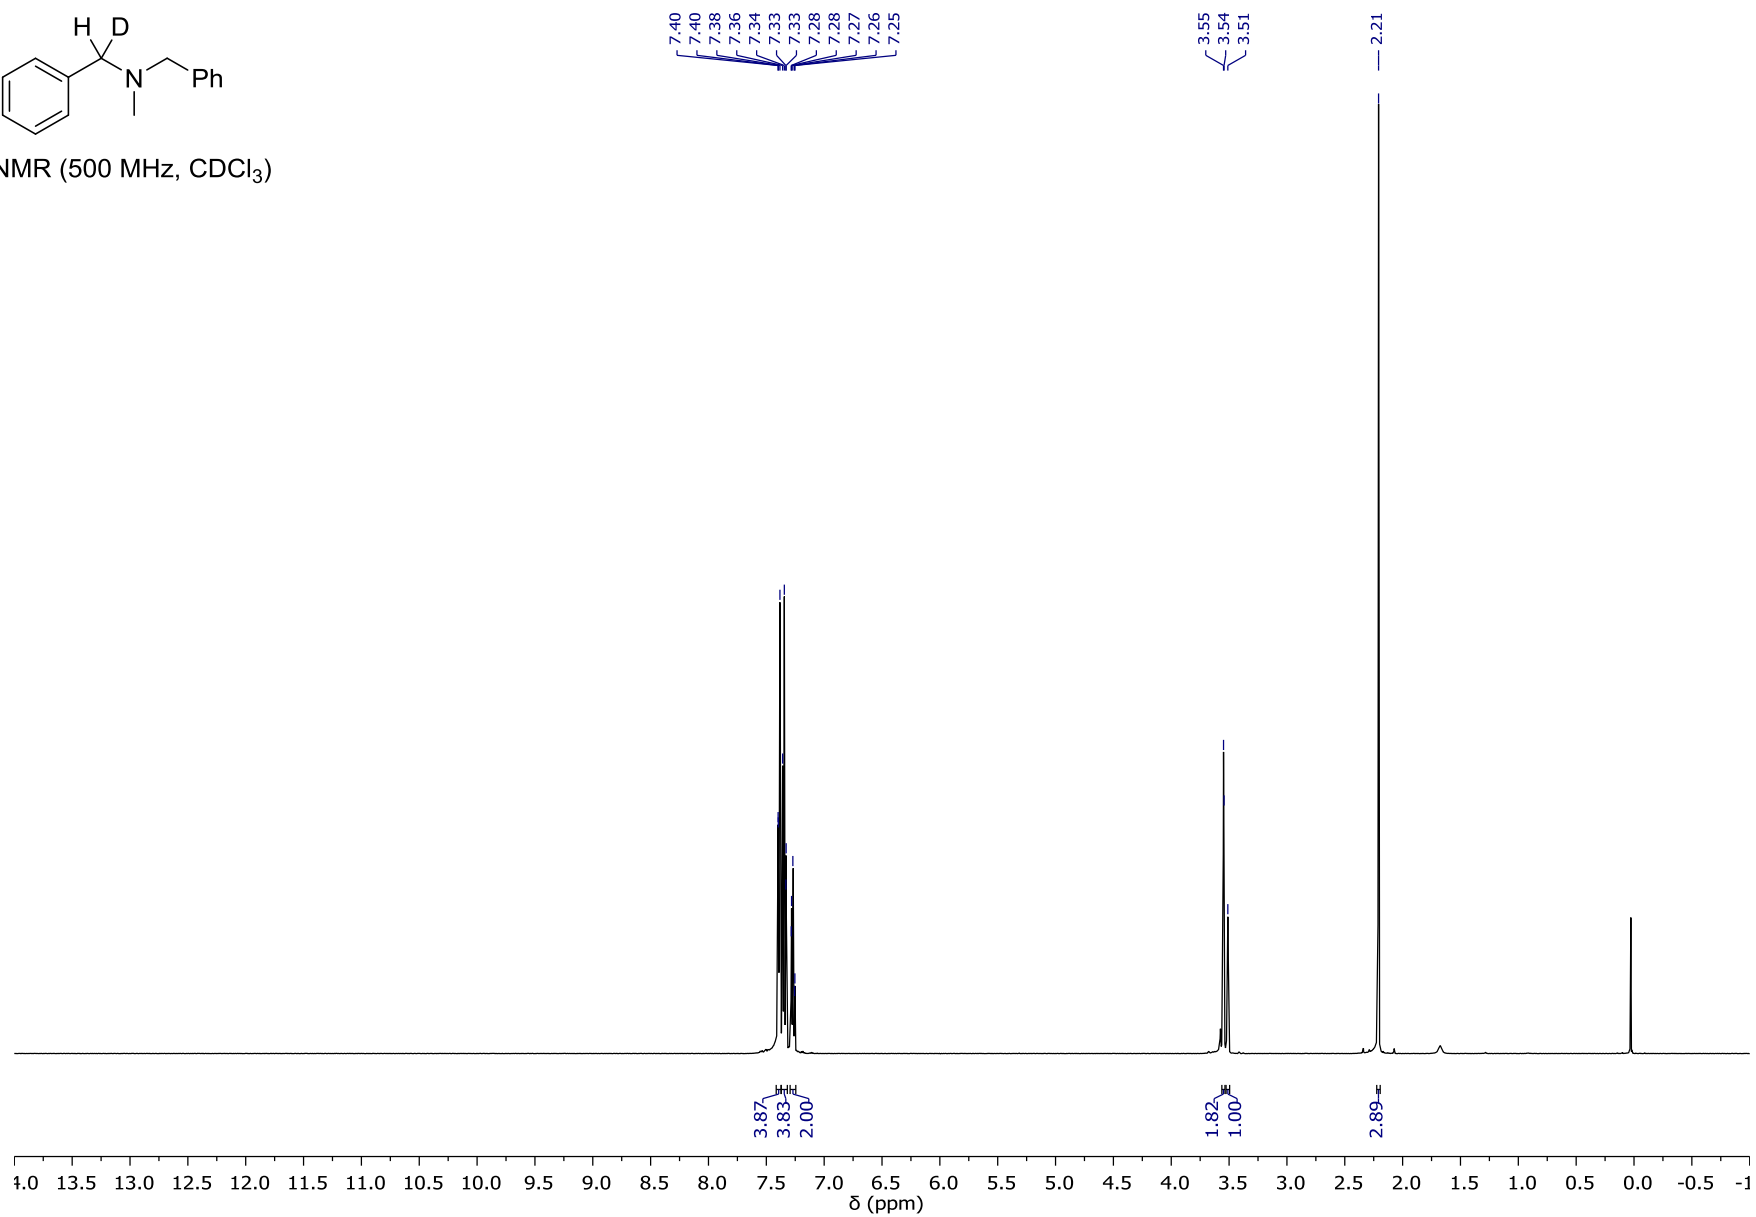

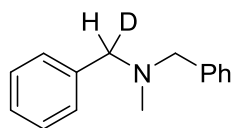

$^{13}\text{C}$  NMR (126 MHz,  $\text{CDCl}_3$ )

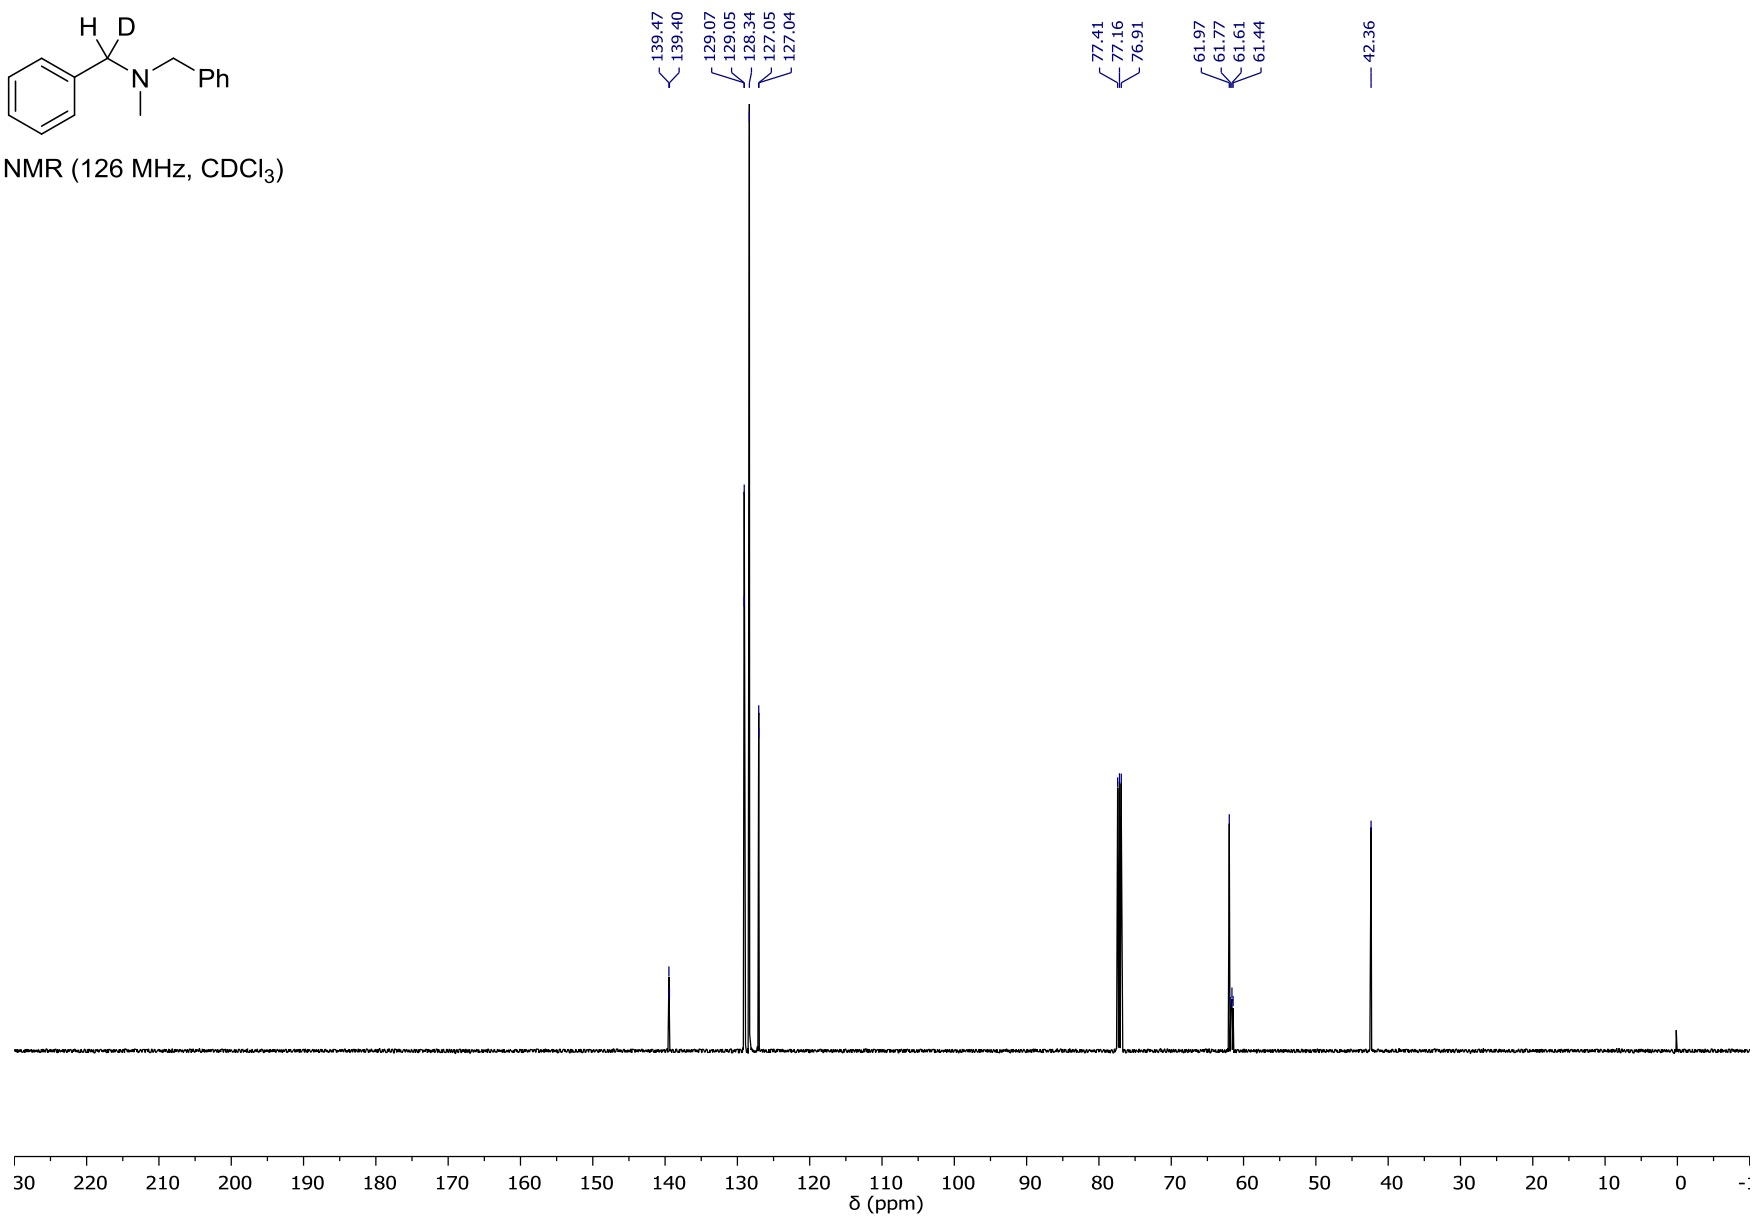

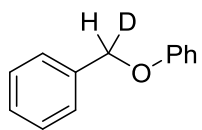

<sup>1</sup>H NMR (500 MHz, CDCl<sub>3</sub>)

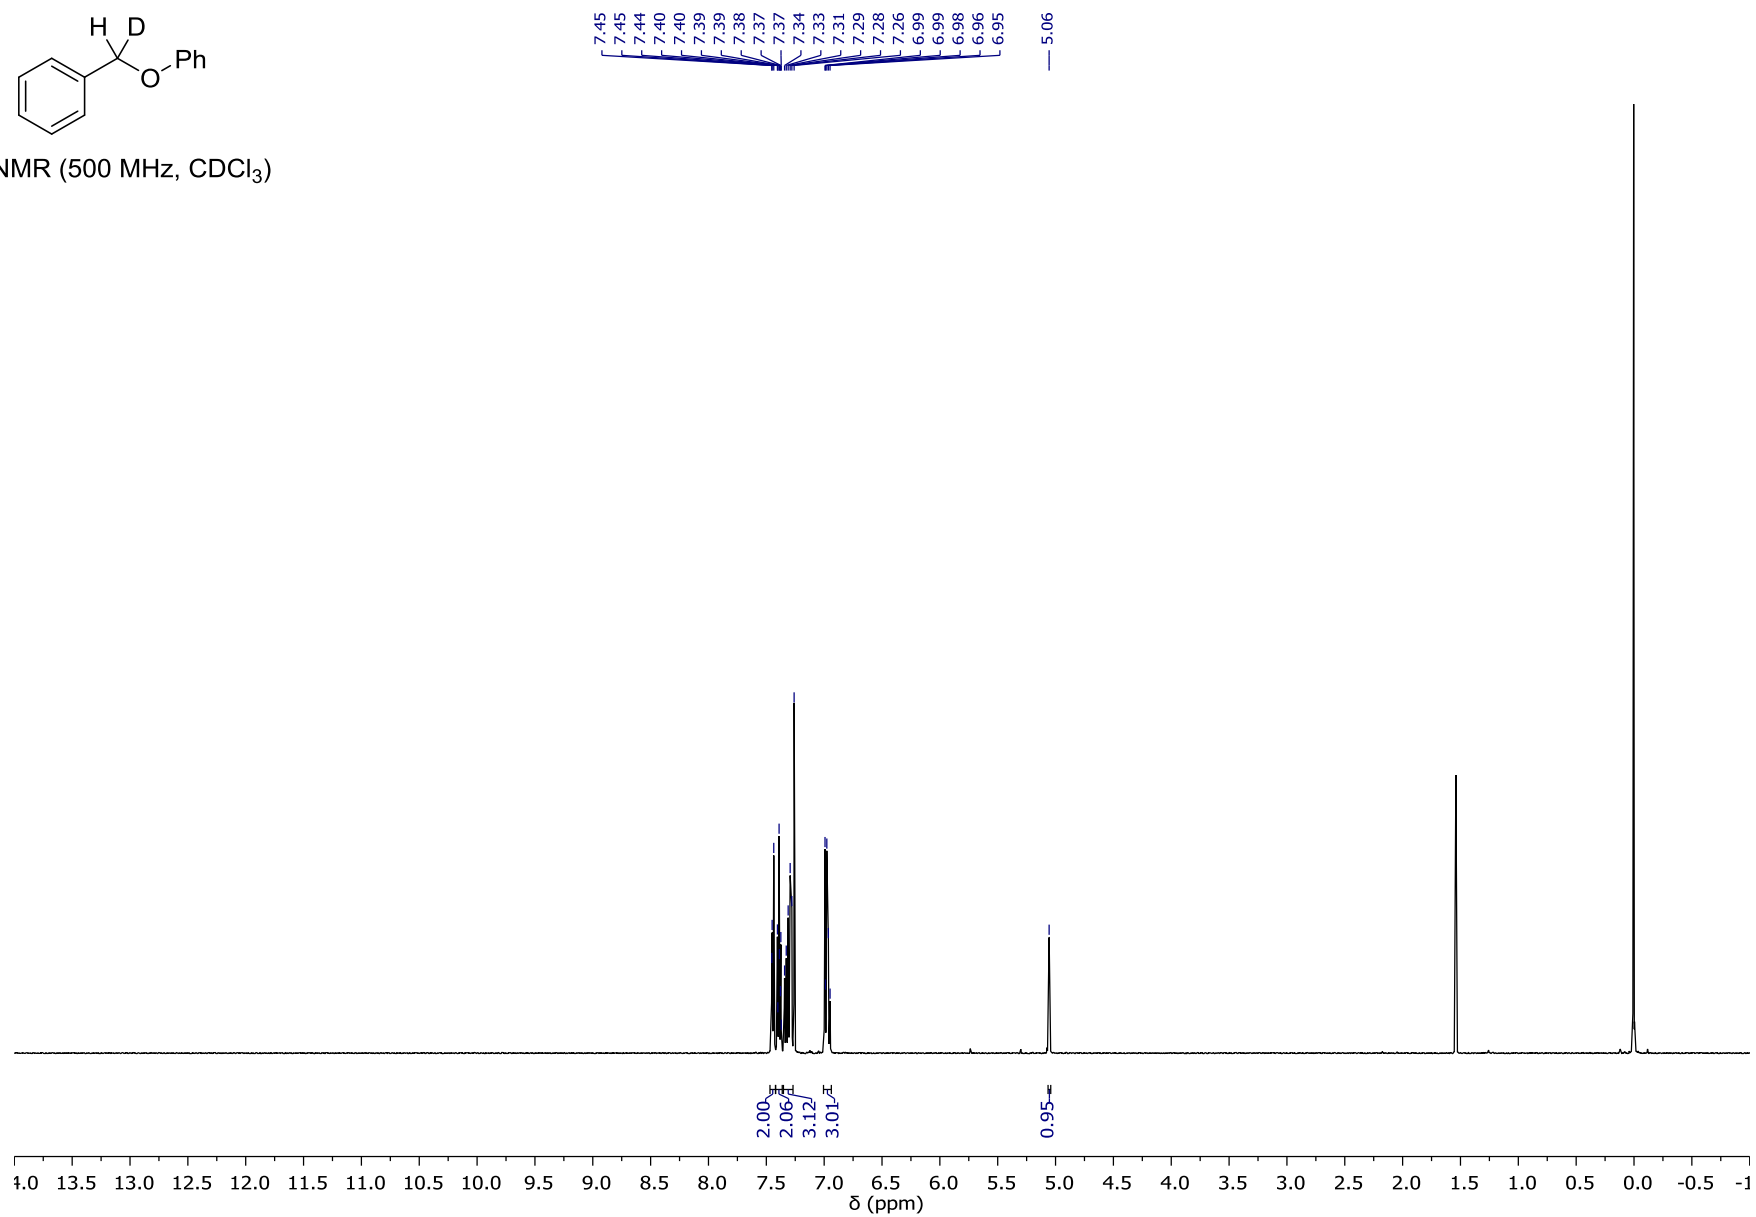

7.39  
7.39  
7.39  
7.39  
7.38  
7.38  
7.38  
7.37  
7.37  
7.37  
7.37  
7.36  
7.36  
7.36  
7.35  
7.35  
7.35  
7.34  
7.33  
7.33  
7.33  
7.30  
7.30  
7.29  
7.29  
7.29  
7.28  
7.28  
7.28  
7.28  
7.27  
7.27  
7.27  
7.26  
7.26  
7.26  
7.20  
7.20  
7.19  
7.19  
7.18  
7.18  
7.18  
7.17  
7.17  
7.17  
7.16  
7.16  
7.16  
6.74  
6.74  
6.73  
6.72  
6.72  
6.72  
6.71  
6.71  
6.70  
6.66  
6.66  
6.66  
6.65  
6.65  
6.65  
6.64  
6.64  
6.64  
6.64  
6.63  
6.63  
4.32  
4.32  
4.03

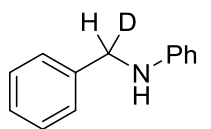

$^1\text{H}$  NMR (500 MHz,  $\text{CDCl}_3$ )

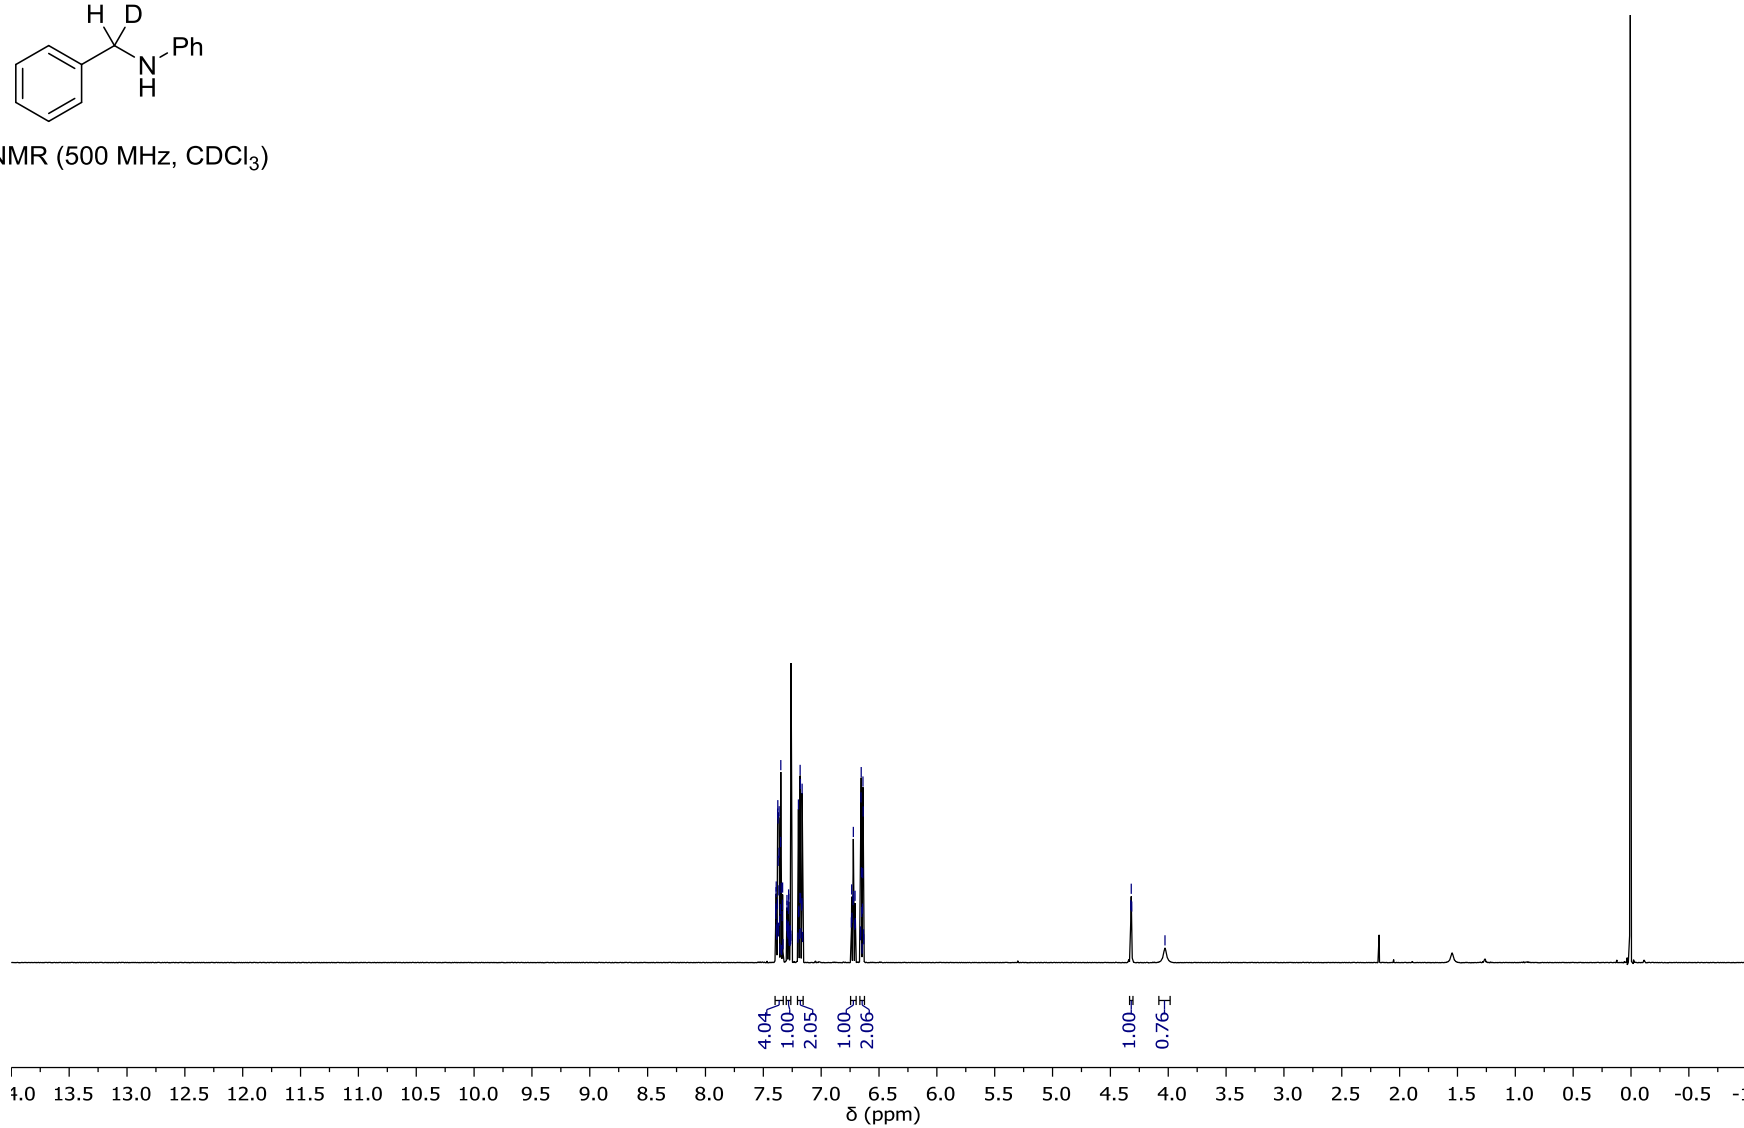

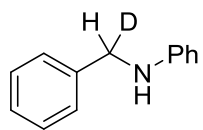

$^{13}\text{C}$  NMR (126 MHz,  $\text{CDCl}_3$ )

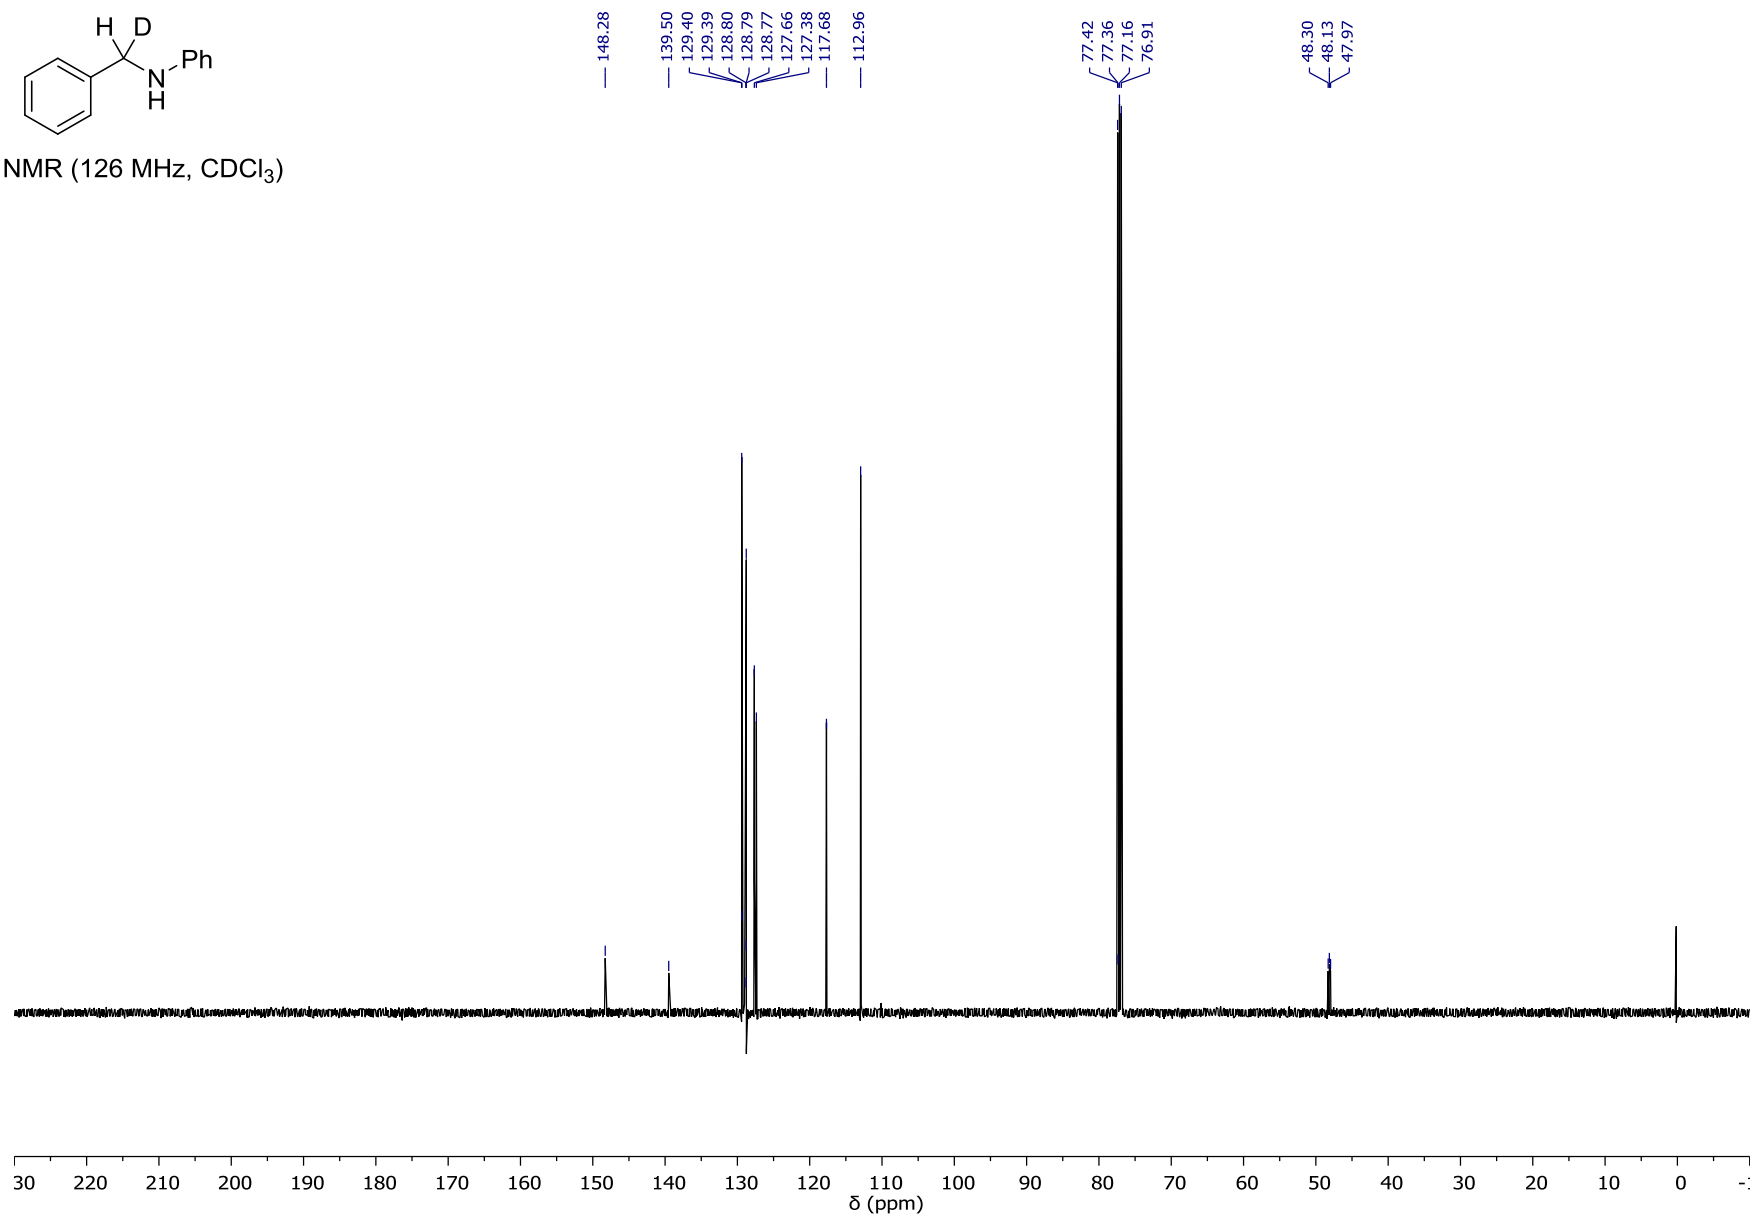

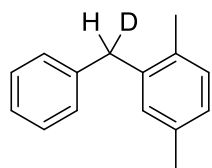

$^1\text{H}$  NMR (500 MHz,  $\text{CDCl}_3$ )

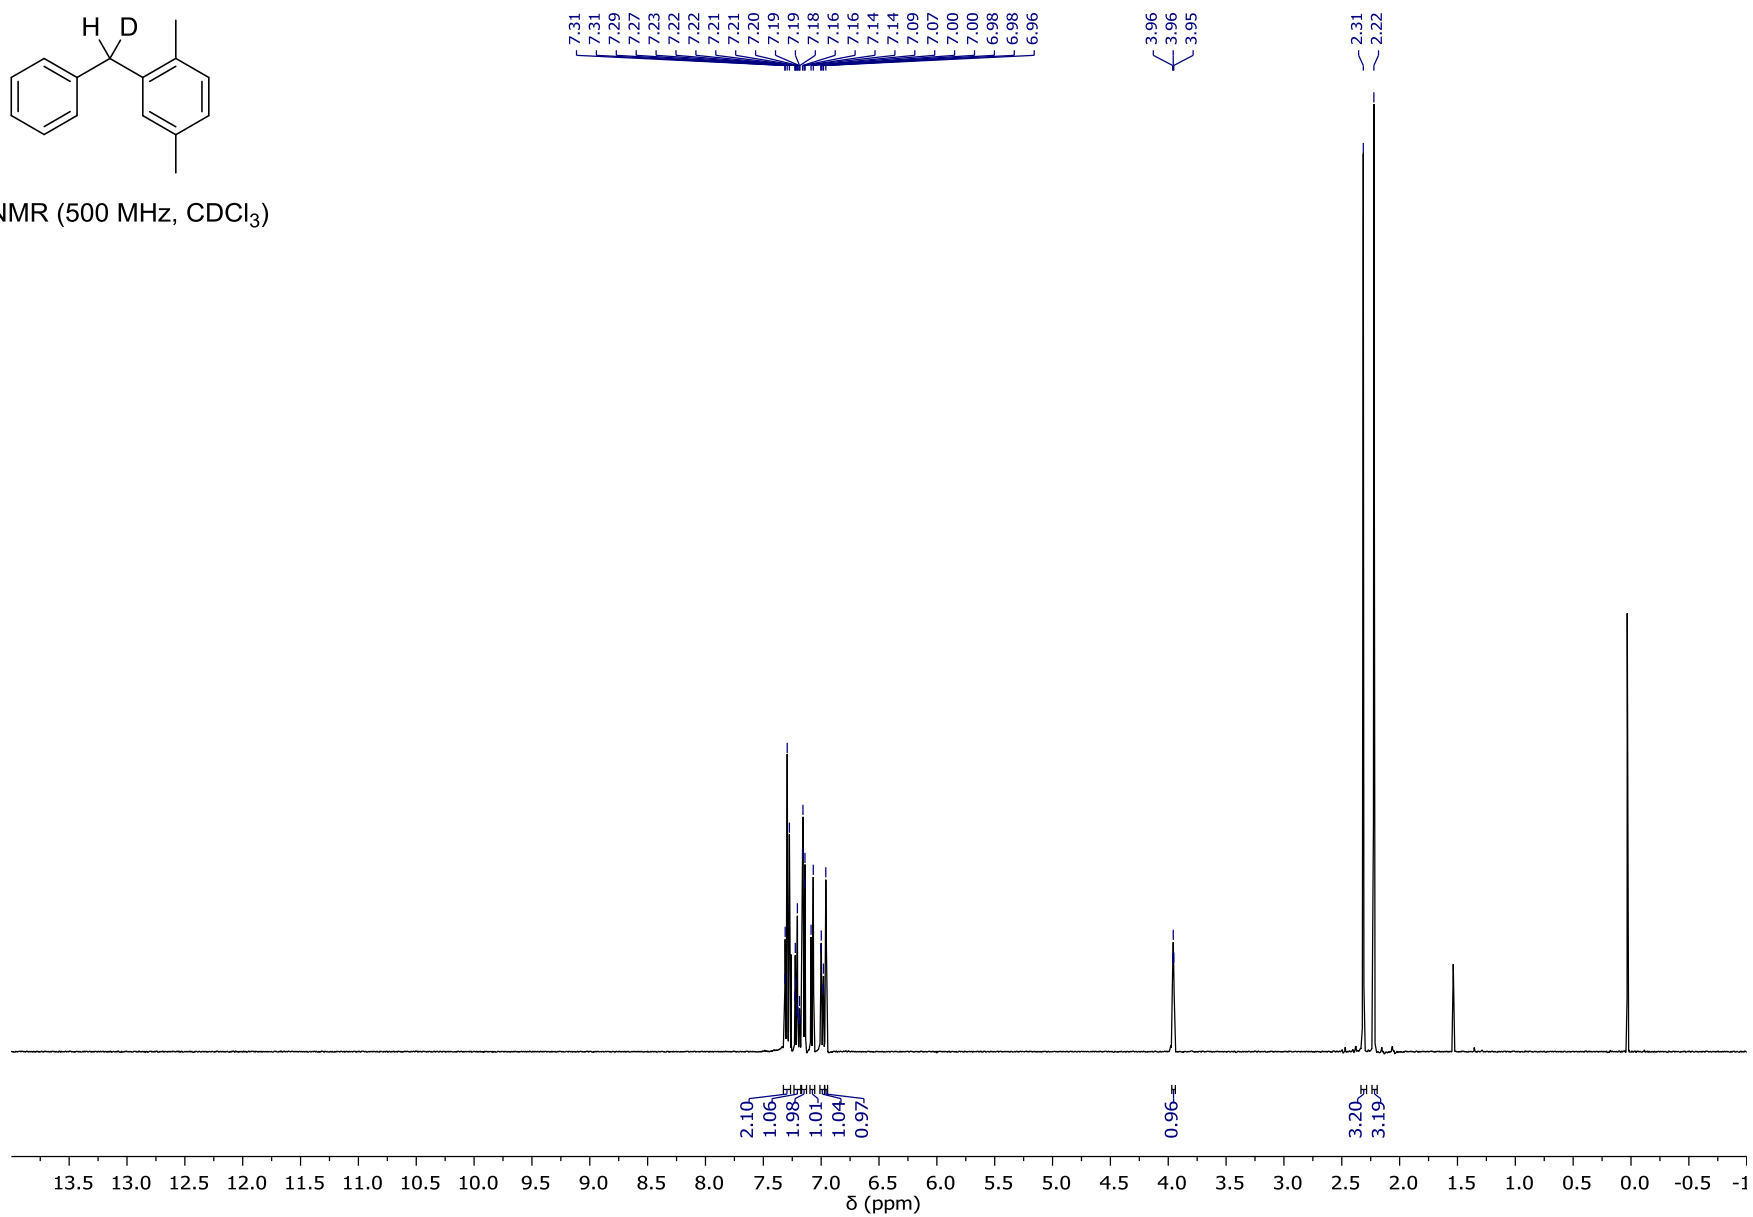



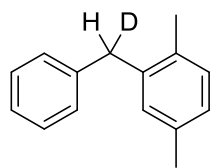

<sup>13</sup>C NMR (101 MHz, CDCl<sub>3</sub>)

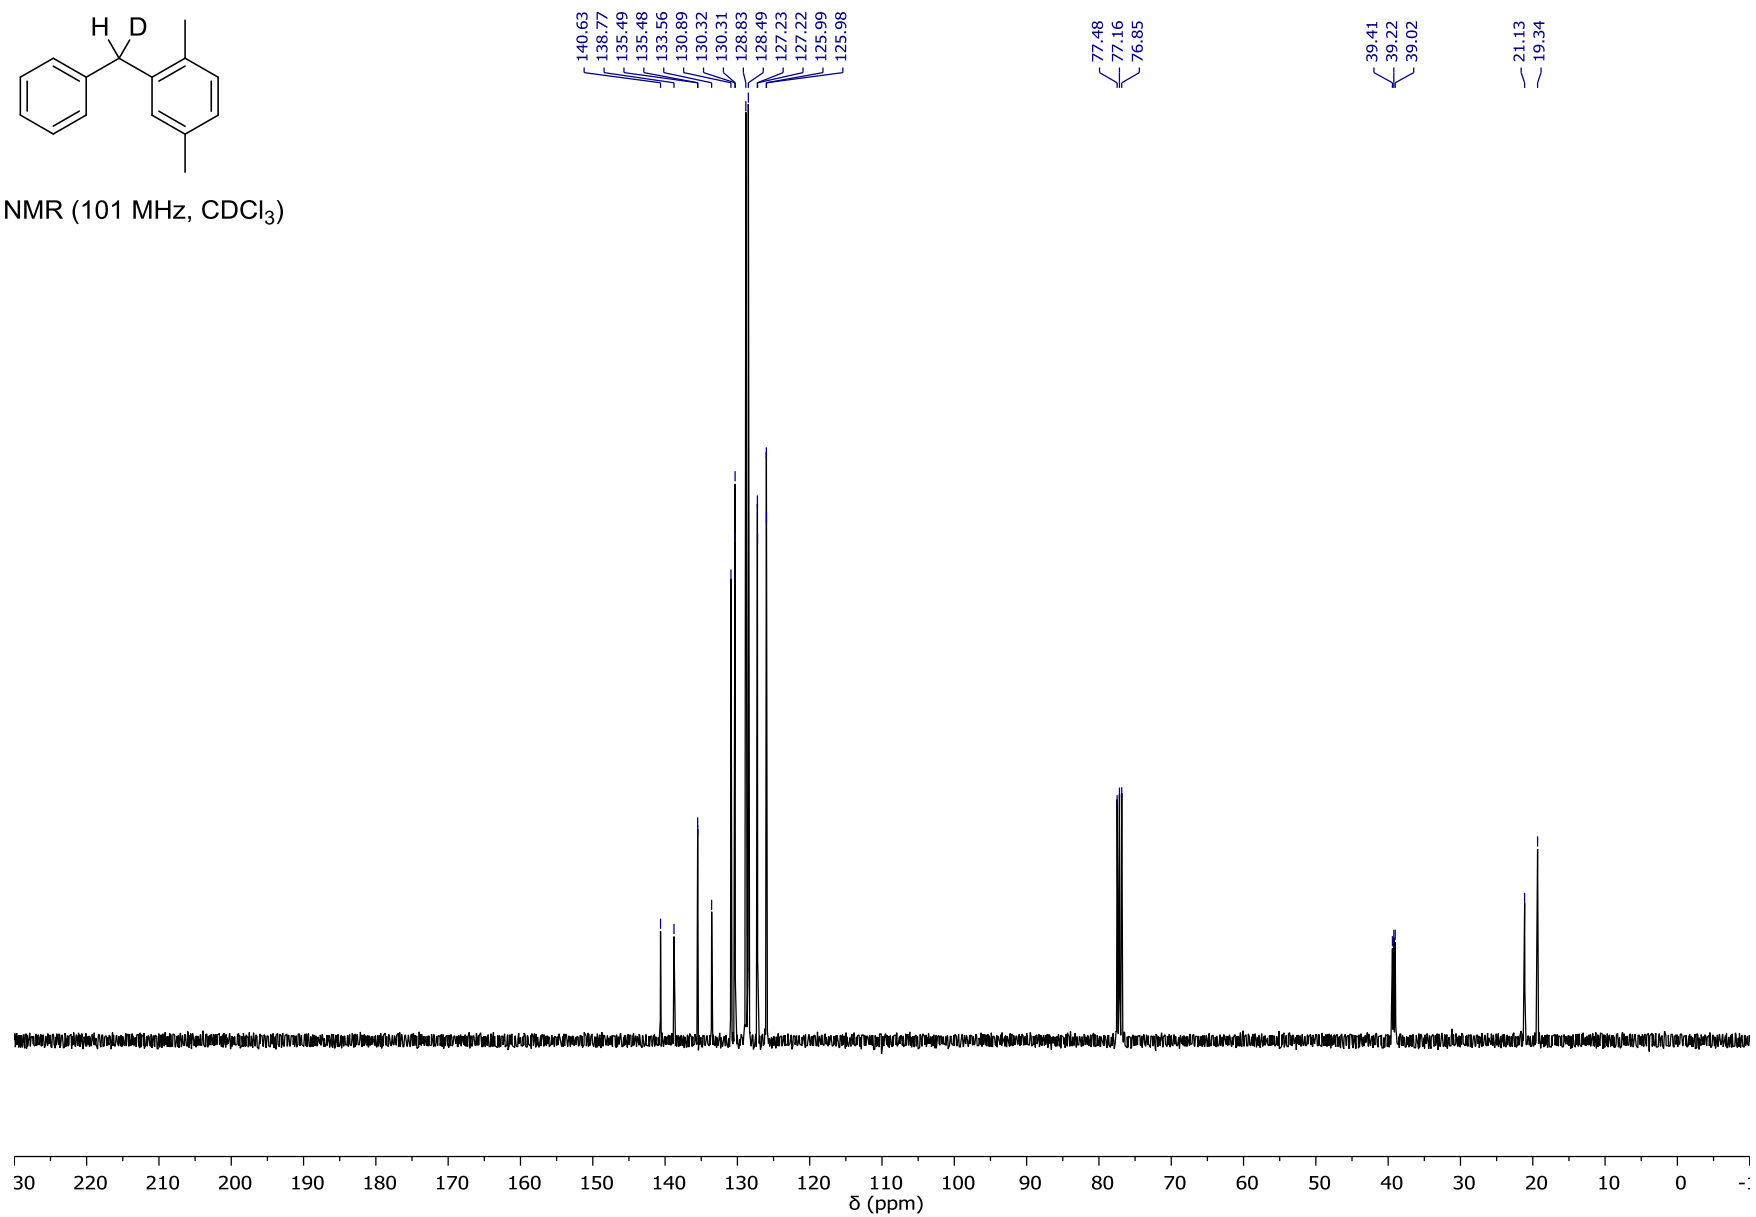

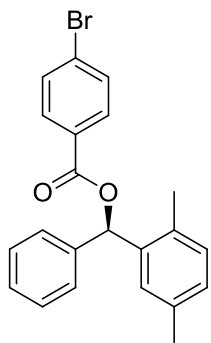

$^1\text{H}$  NMR (400 MHz,  $\text{CDCl}_3$ )

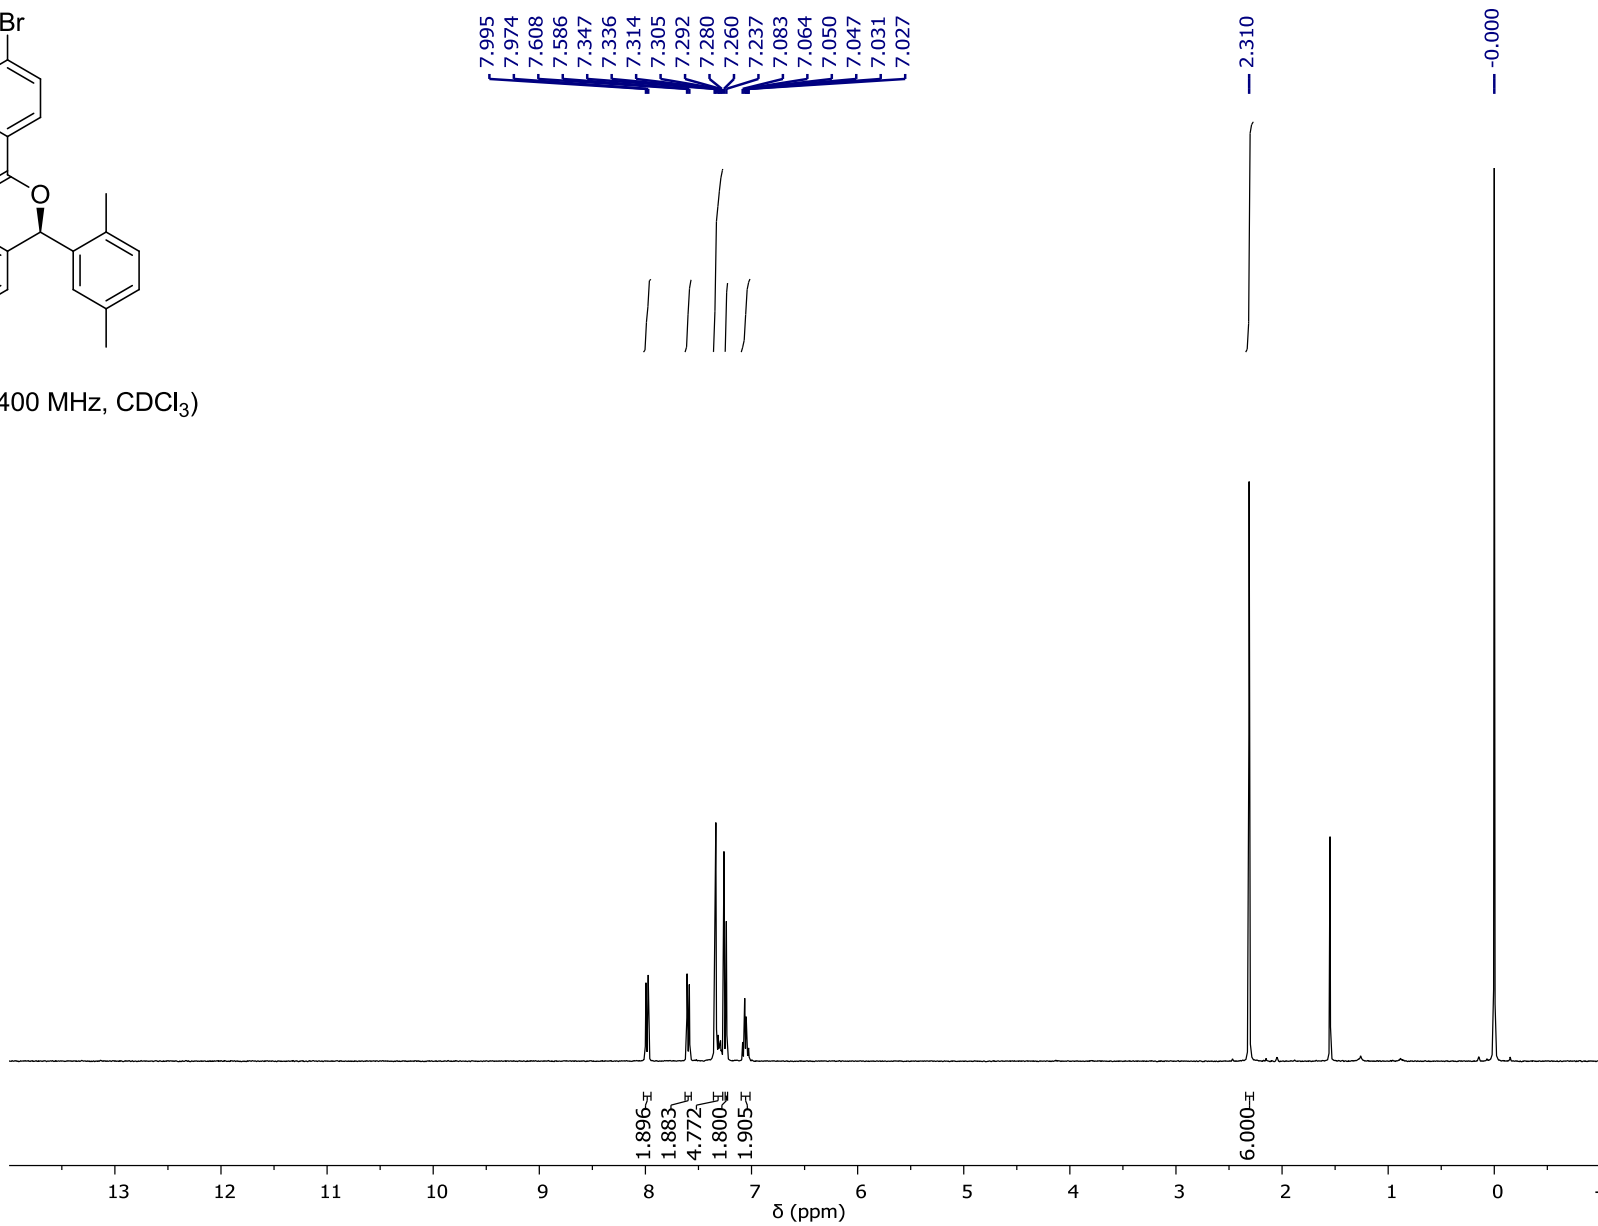

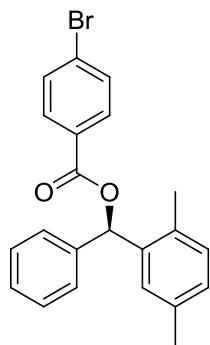

$^{13}\text{C}$  NMR (100 MHz,  $\text{CDCl}_3$ )

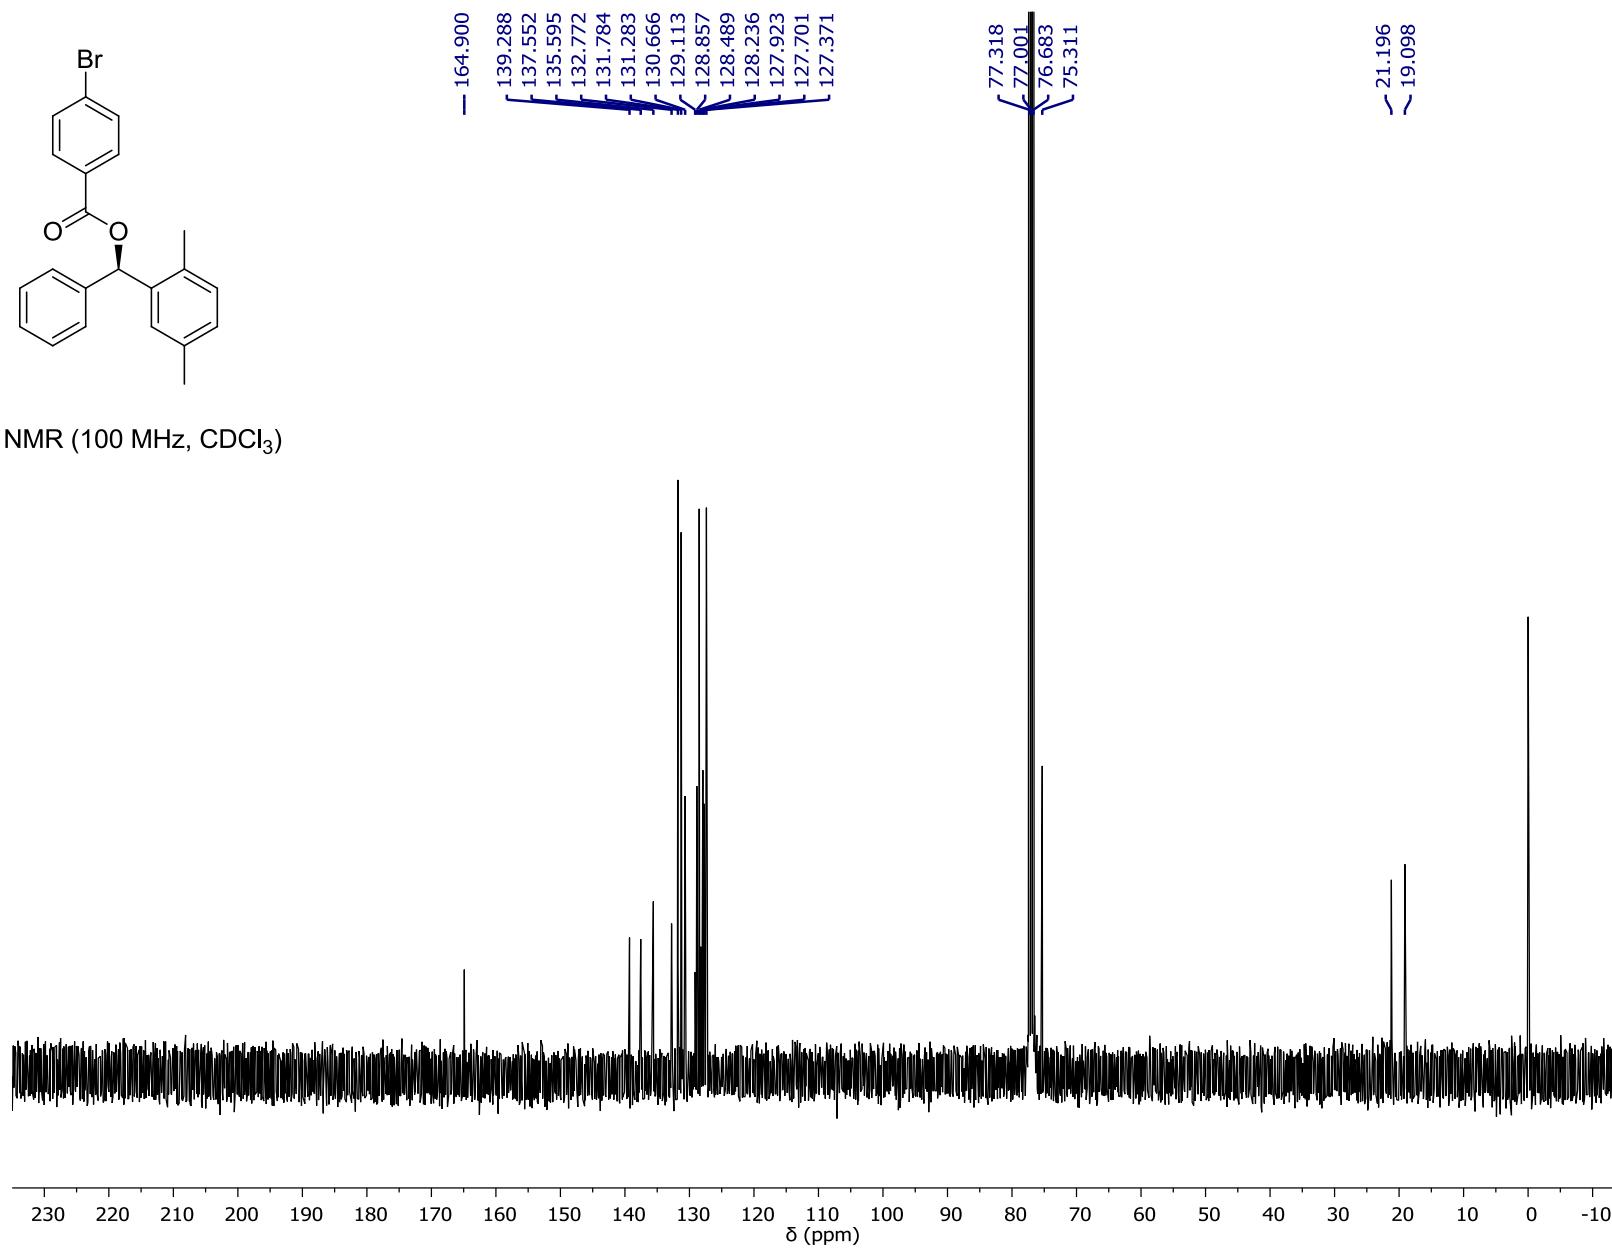

Supplement: Additional file 1 [file 1860-5397-14-6-S1.pdf]
